1 **Imbalance of peptidoglycan biosynthesis alters the cell surface charge of *Listeria***  
2 ***monocytogenes***

3  
4 Lisa Maria Schulz<sup>1</sup>, Patricia Rothe<sup>3</sup>, Sven Halbedel<sup>3,4</sup>, Angelika Gründling<sup>2</sup>, Jeanine  
5 Rismondo<sup>1,2#</sup>

6  
7 <sup>1</sup> Department of General Microbiology, Institute of Microbiology and Genetics, GZMB, Georg-  
8 August University Göttingen, Grisebachstr. 8, 37077 Göttingen, Germany

9 <sup>2</sup> Section of Molecular Microbiology and Medical Research Council Centre for Molecular  
10 Bacteriology and Infection, Imperial College London, London SW7 2AZ, United Kingdom

11 <sup>3</sup> FG11, Division of Enteropathogenic bacteria and *Legionella*, Robert Koch Institute,  
12 Burgstraße 37, 38855 Wernigerode, Germany

13 <sup>4</sup> Institute for Medical Microbiology and Hospital Hygiene, Otto von Guericke University  
14 Magdeburg, Leipziger Straße 44, 39120 Magdeburg, Germany

15  
16 # To whom correspondence should be addressed: Jeanine Rismondo - [jrismon@gwdg.de](mailto:jrismon@gwdg.de)

17  
18 Keywords: *Listeria monocytogenes*; peptidoglycan biosynthesis; lysozyme; wall teichoic acid

19

## 20 **ABSTRACT**

21 The bacterial cell wall is composed of a thick layer of peptidoglycan and cell wall polymers,  
22 which are either embedded in the membrane or linked to the peptidoglycan backbone and  
23 referred to as lipoteichoic acid (LTA) and wall teichoic acid (WTA), respectively. Modifications  
24 of the peptidoglycan or WTA backbone can alter the susceptibility of the bacterial cell towards  
25 cationic antimicrobials and lysozyme. The human pathogen *Listeria monocytogenes* is  
26 intrinsically resistant towards lysozyme, mainly due to deacetylation and O-acetylation of the  
27 peptidoglycan backbone via PgdA and OatA. Recent studies identified additional factors, which  
28 contribute to the lysozyme resistance of this pathogen. One of these is the predicted ABC  
29 transporter, EslABC. An *eslB* mutant is hyper-sensitive towards lysozyme, likely due to the  
30 production of thinner and less O-acetylated peptidoglycan. Using a suppressor screen, we  
31 show here that suppression of *eslB* phenotypes could be achieved by enhancing peptidoglycan  
32 biosynthesis, reducing peptidoglycan hydrolysis or alterations in WTA biosynthesis and  
33 modification. The lack of EslB also leads to a higher negative surface charge, which likely  
34 stimulates the activity of peptidoglycan hydrolases and lysozyme. Based on our results, we  
35 hypothesize that the portion of cell surface exposed WTA is increased in the *eslB* mutant due  
36 to the thinner peptidoglycan layer and that latter one could be caused by an impairment in  
37 UDP-N-acetylglucosamine (UDP-GlcNAc) production or distribution.

38

## 39 **1. INTRODUCTION**

40 In recent years, antibiotic resistance became a serious threat for public health. One of  
41 the main targets of currently available antibiotics is the bacterial cell wall (Fig. 1). In Gram-  
42 positive bacteria, the cell wall consists of a thick layer of peptidoglycan and cell wall polymers,  
43 which are either tethered to the cell membrane or covalently linked to peptidoglycan and  
44 referred to as lipoteichoic (LTA) and wall teichoic acid (WTA), respectively. Peptidoglycan  
45 biosynthesis starts in the cytoplasm by the conversion of UDP-N-acetylglucosamine (UDP-  
46 GlcNAc) to UDP-N-acetylmuramic acid (UDP-MurNAc) via MurA and MurB. The activity of the  
47 UDP-GlcNAc 1-carboxyvinyltransferase MurA can be specifically inhibited by the antibiotic  
48 fosfomycin (Fig. 1)(Kahan et al., 1974). In the subsequent steps, which are depicted in Figure  
49 1, the peptidoglycan precursor lipid II is synthesized in the cytoplasm and transported across  
50 the membrane by the flippase MurJ (Meeske et al., 2015; Ruiz, 2008; Sham et al., 2014). Lipid  
51 II is then incorporated into the growing glycan strand by members of the SEDS (shape,  
52 elongation, division, sporulation) protein family, namely RodA and FtsW, which act in concert  
53 with class B penicillin binding proteins (PBPs) that have a transpeptidase activity (Cho et al.,  
54 2016; Leclercq et al., 2017; Taguchi et al., 2019). Recent findings led to the conclusion that  
55 class A PBPs, which possess a glycosyltransferase and a transpeptidase domain, are mainly  
56 involved in filling gaps and/or repair defects in the peptidoglycan mesh, rather than being the

57 main enzymes involved in peptidoglycan polymerization and crosslinking (Cho et al., 2016;  
58 Dion et al., 2019; Vigouroux et al., 2020). The ability of bacterial cells to elongate and divide  
59 depends on the activity of peptidoglycan hydrolases. Two DL-endopeptidase, CwIO and LytE,  
60 are essential for cell elongation in *Bacillus subtilis*. In addition to its role in cell elongation, LytE  
61 is also involved in cell separation (Carballido-López et al., 2006; Ohnishi et al., 1999; Vollmer  
62 et al., 2008). Both enzymes cleave the peptide bond between D-glutamic acid and *meso*-  
63 diamino pimelic acid of the peptidoglycan peptide, thereby allowing the insertion of new  
64 peptidoglycan material (Yamaguchi et al., 2004). Lack of CwIO results in cell shortening, while  
65 absence of CwIO and LytE is lethal (Domínguez-Cuevas et al., 2013; Hashimoto et al., 2012).  
66 Peptidoglycan biosynthesis and hydrolysis need to be tightly regulated to prevent cell lysis. In  
67 *B. subtilis*, this regulation is partly achieved by controlling expression of *cwIO* and *lytE* via the  
68 essential two-component system WalRK, whose expression is for instance induced during heat  
69 stress (Bisicchia et al., 2007; Dubrac et al., 2008; Takada et al., 2018). On the other hand,  
70 activity of CwIO depends on a direct protein-protein interaction with the ABC transporter FtsEX  
71 (Meisner et al., 2013). The FtsEX-dependent regulation of *B. subtilis* CwIO further depends on  
72 the presence of two cofactors, SweC and SweD (Brunet et al., 2019; Rismondo and Schulz,  
73 2021).

74 UDP-GlcNAc is synthesized from fructose-6-phosphate via a four-step reaction  
75 catalyzed by GlmS, GlmM, GlmU and GlmR and serves as a substrate of MurA. Recent  
76 findings suggest that the UDP-GlcNAc biosynthetic pathway can be inhibited by *trans*-  
77 cinnamaldehyde (*t*-Cin) (Fig. 1)(Pensinger et al., 2021; Sun et al., 2021). UDP-GlcNAc is also  
78 consumed by TarO/TagO, which catalyzes the first committed step for the synthesis of WTA  
79 (Soldo et al., 2002). The activity of TarO/TagO can be blocked by tunicamycin, which also  
80 affects the activity of MraY at high concentrations (Campbell et al., 2011; Hakulinen et al.,  
81 2017; Price and Tsvetanova, 2007; Watkinson et al., 1971). In *L. monocytogenes* 10403S,  
82 WTA is composed of a glucose-glucose(Glc-Glc)-glycerol phosphate-GlcNAc-*N*-  
83 acetylmannosamine (ManNAc) linker unit and an anionic ribitol phosphate backbone, which  
84 can be modified with rhamnose, GlcNAc and D-alanine residues (Shen et al., 2017). The  
85 modification of WTA with positively charged D-alanine residues helps to mask the negative  
86 charge of the ribitol phosphate backbone, thereby conferring resistance towards cationic  
87 antimicrobial peptides and lysozyme (Brown et al., 2013; Vadyvaloo et al., 2004).

88 Lysozyme is an enzyme that cleaves the  $\beta$ -1,4-glycosidic bond between MurNAc and  
89 GlcNAc of the bacterial peptidoglycan backbone and is found in human body fluids such as  
90 tears, saliva and mucus. *L. monocytogenes* is intrinsically resistant towards lysozyme, which  
91 is mainly achieved by modifications of the peptidoglycan. PgdA, an *N*-deacetylase, and OatA,  
92 an *O*-acetyltransferase, deacetylate and acetylate the GlcNAc and MurNAc residues,  
93 respectively (Aubry et al., 2011; Boneca et al., 2007). In addition to peptidoglycan modifying

94 enzymes, lysozyme resistance of *L. monocytogenes* is affected by the activity of the predicted  
95 carboxypeptidase PbpX, the non-coding RNA Rli31 and the transcription factor DegU (Burke  
96 et al., 2014). Interestingly, it was also been observed that the lack of components of the  
97 putative ABC transporter EslABC leads to a strong reduction in lysozyme resistance (Burke et  
98 al., 2014; Durack et al., 2015; Rismondo et al., 2021b). Recently, we could show that the  
99 absence of EslB, one of the transmembrane proteins of the EslABC transporter, resulted in the  
100 production of a thinner peptidoglycan layer and a reduction in O-acetylation of the  
101 peptidoglycan, which likely contributes to the reduced lysozyme resistance. Additionally, we  
102 observed that the *eslB* mutant is unable to grow in media containing high sugar concentrations  
103 and that the strain has a cell division defect (Rismondo et al., 2021b; Rismondo and Schulz,  
104 2021).

105 In the current study, we used a suppressor screen to gain further insights into the role  
106 of EslABC on the physiology of *L. monocytogenes*. This screen revealed that phenotypes of  
107 the *eslB* mutant can either be suppressed by enhancing peptidoglycan biosynthesis, reducing  
108 peptidoglycan hydrolysis or by altering WTA production or modification. Using a cytochrome C  
109 assay, we further demonstrate that the lack of EslB manifests in a higher negative surface  
110 charge, which likely affects the activity of peptidoglycan hydrolases and provides an additional  
111 explanation for the increased lysozyme sensitivity of the *eslB* mutant.

112

## 113 2. MATERIALS AND METHODS

114 **2.1 Bacterial Strains and growth conditions.** All strains and plasmids used in this study are  
115 listed in Table S1. *Escherichia coli* strains were grown in Luria-Bertani (LB) medium and  
116 *Listeria monocytogenes* strains in brain heart infusion (BHI) medium at 37°C unless otherwise  
117 stated. Where required, antibiotics and supplements were added to the medium at the following  
118 concentrations: for *E. coli* cultures, ampicillin (Amp) at 100 µg ml<sup>-1</sup>, kanamycin (Kan) at 30 µg  
119 ml<sup>-1</sup>, and for *L. monocytogenes* cultures, chloramphenicol (Cam) at 10 µg ml<sup>-1</sup>, erythromycin  
120 (Erm) at 5 µg ml<sup>-1</sup>, Kan at 30 µg ml<sup>-1</sup>, nalidixic acid (Nal) at 30 µg ml<sup>-1</sup>, streptomycin (Strep) at  
121 200 µg ml<sup>-1</sup> and IPTG at 1 mM.

122

123 **2.2 Strain and plasmid construction.** All primers used in this study are listed in Table S2.  
124 For the construction of pIMK3-*murA*, pIMK3-*glmR*, pIMK3-*glmU* and pIMK3-*glmM*, the *murA*,  
125 *glmR*, *glmU* and *glmM* genes were amplified using primer pairs JR90/JR91, JR134/JR135,  
126 JR136/JR137 and JR138/JR139, respectively, cut with *Nco*I and *Sa*II and ligated into plasmid  
127 pIMK3 that had been cut with the same enzymes. The resulting plasmids pIMK3-*murA*, pIMK3-  
128 *glmR*, pIMK3-*glmU* and pIMK3-*glmM* were recovered in *E. coli* XL1-Blue yielding strains  
129 EJ52, EJ106, EJ107 and EJ108. Next, plasmids pIMK3-*murA*, pIMK3-*glmR*, pIMK3-  
130 *glmU* and pIMK3-*glmM* were transformed into *E. coli* S17-1 yielding strains EJ59, EJ132,

131 EJ133 and EJ134. Strain EJ59 was used as a donor strain to transfer plasmid pIMK3-  
132 *murA* by conjugation into *L. monocytogenes* strains 10403S (ANG1263) and 10403S $\Delta$ *esB*<sub>(2)</sub>  
133 (ANG5662) using a previously described method (Lauer et al., 2002). This resulted in the  
134 construction of strains 10403S pIMK3-*murA* (LJR26) and 10403S $\Delta$ *esB*<sub>(2)</sub> pIMK3-*murA*  
135 (LJR27), in which the expression of *murA* is under the control of an IPTG-inducible promoter.  
136 Strains carrying the empty pIMK3 vector were used as controls. For this purpose, pIMK3 was  
137 transformed into *E. coli* S17-1 yielding strain EJ58. S17-1 pIMK3 was subsequently used as  
138 a donor strain to transfer plasmid pIMK3 by conjugation into *L. monocytogenes* strains 10403S  
139 (ANG1263) and 10403S $\Delta$ *esB*<sub>(2)</sub> (ANG5662), which resulted in the construction of strains  
140 10403S pIMK3 (LJR24) and 10403S $\Delta$ *esB*<sub>(2)</sub> pIMK3 (LJR25). For the construction of pIMK3-  
141 *glmS*, the *glmS* gene was amplified using primer pair JR140/JR141. The resulting PCR product  
142 was cut with *Bam*HI and *Xma*I and ligated into plasmid pIMK3 that had been cut with the same  
143 enzymes. Plasmid pIMK3-*glmS* was recovered in *E. coli* XL1-Blue and subsequently  
144 transformed into *E. coli* S17-1 yielding strains EJ112 and EJ135, respectively. Strains  
145 EJ132, EJ133, EJ134 and EJ135 were used to transfer plasmids pIMK3-*glmR*, pIMK3-  
146 *glmU*, pIMK3-*glmM* and pIMK3-*glmS* by conjugation into *L. monocytogenes* strain  
147 10403S $\Delta$ *esB*<sub>(2)</sub> (ANG5662) yielding strains 10403S $\Delta$ *esB*<sub>(2)</sub> pIMK3-*glmR* (LJR63),  
148 10403S $\Delta$ *esB*<sub>(2)</sub> pIMK3-*glmU* (LJR64), 10403S $\Delta$ *esB*<sub>(2)</sub> pIMK3-*glmM* (LJR65) and  
149 10403S $\Delta$ *esB*<sub>(2)</sub> pIMK3-*glmS* (LJR66).

150 For the construction of a markerless deletion of *cwI*O (*Imrg*<sub>01743</sub>), 1-kb DNA  
151 fragments up- and downstream of *cwI*O were amplified by PCR with primers LMS106/107 and  
152 LMS104/105. The resulting PCR products were fused in a second PCR using primers  
153 LMS105/106, the product cut with *Bam*HI and *Kpn*I and ligated into pKSV7 that had been cut  
154 with the same enzymes. The resulting plasmid pKSV7- $\Delta$ *cwI*O was recovered in *E. coli* XL1-  
155 Blue yielding strain EJ63. Plasmid pKSV7- $\Delta$ *cwI*O was subsequently transformed into *L.*  
156 *monocytogenes* 10403S and *cwI*O deleted by allelic exchange according to a previously  
157 published method (Camilli et al., 1993) yielding strain 10403S $\Delta$ *cwI*O (LJR37). Since attempts  
158 of producing electrocompetent *cwI*O cells were unsuccessful, plasmid pIMK3-*cwI*O was first  
159 conjugated into strain LJR37, which allows for IPTG-inducible expression of *cwI*O, and  
160 resulting in the construction of strain LJR103. For the construction of pIMK3-*cwI*O, *cwI*O was  
161 amplified using the primer pair LMS226 and LMS227. The fragment was cut with *Nco*I and  
162 *Bam*HI, ligated into pIMK3 that had been cut with the same enzymes and recovered in *E. coli*  
163 XL1-blue and S17-1, yielding strains EJ114 and EJ115, respectively. To generate a *cwI*O  
164 *esB* double mutant, plasmid pKSV7- $\Delta$ *esB* was first transformed into *L. monocytogenes* strain  
165 LJR103 resulting in strain LJR114. The *esB* gene was then deleted by allelic exchange. This  
166 resulted in the construction of strain 10403S $\Delta$ *cwI*O  $\Delta$ *esB* pIMK3-*cwI*O (LJR119).

167 For the construction of promoter-*lacZ* fusions, the plasmid pAC7 was used. The  
168 promoter region of the *dlt* operon was amplified from genomic DNA of the *L. monocytogenes*  
169 wildtype 10403S and the *eslB* suppressor strain ANG5746 containing a mutation 31 bp  
170 upstream of the ATG start codon, using the primer pair LMS93 and LMS94. The PCR products  
171 were digested with BamHI and EcoRI and ligated into pAC7. The resulting plasmids pAC7-*P<sub>dlt</sub>*  
172 and pAC7-*P<sub>dlt</sub>*<sup>\*</sup> were recovered in XL1 Blue resulting in strains EJR50 and EJR51.  
173 Subsequently, both plasmids were integrated into the *amyE* site of the *B. subtilis* wildtype strain  
174 168, resulting in strains BLMS4 and BLMS5, respectively.

175

176 **2.3 Generation of *eslB* suppressors and whole genome sequencing.** For the generation  
177 of *eslB* suppressors, overnight cultures of three independently generated *L. monocytogenes*  
178 *eslB* mutants, strains 10403SΔ*eslB*<sub>(1)</sub> (ANG4275), 10403SΔ*eslB*<sub>(2)</sub> (ANG5662) and  
179 10403SΔ*eslB*<sub>(3)</sub> (ANG5685), were adjusted to an OD<sub>600</sub> of 1. 100 μl of 10<sup>-1</sup> and 10<sup>-2</sup> dilutions of  
180 these cultures were plated on BHI plates containing (A) 0.5 M sucrose and 0.025 μg ml<sup>-1</sup>  
181 penicillin, (B) 0.5 M sucrose and 0.05 μg ml<sup>-1</sup> penicillin or (C) 100 μg ml<sup>-1</sup> lysozyme, conditions  
182 under which the *eslB* mutant is unable to grow while the *L. monocytogenes* wildtype strain  
183 10403S can grow. The plates were incubated at 37°C overnight and single colonies were re-  
184 streaked on BHI plates. This procedure was repeated at least three independent times per  
185 condition. The genome sequence of a selection of *eslB* suppressors was determined by whole  
186 genome sequencing (WGS) using an Illumina MiSeq machine and a 150 paired end Illumina  
187 kit as described previously (Rismondo et al., 2021b). The reads were trimmed, mapped to the  
188 *L. monocytogenes* 10403S reference genome (NC\_017544) and single nucleotide  
189 polymorphisms (SNPs) with a frequency of at least 90% identified using CLC workbench  
190 genomics (Qiagen) and Geneious Prime® v.2021.0.1. The whole genome sequencing data  
191 were deposited at the European Nucleotide Archive (ENA) under accession number  
192 PRJEB55822.

193

194 **2.4 Determination of resistance towards antimicrobials.** For the disk diffusion assays,  
195 overnight cultures of the indicated *L. monocytogenes* strains were adjusted to an OD<sub>600</sub> of 0.1.  
196 100 μl of cultures were spread on BHI agar plates using a cotton swap. Plates contained 1 mM  
197 IPTG were indicated. 6 mm filter disks were placed on top of the agar surface, soaked with 20  
198 μl of the appropriate antibiotic stock solution and the plates were incubated at 37°C. The  
199 diameter of the inhibition zone was measured the next day. The following stock solutions were  
200 used: 50 mg ml<sup>-1</sup> fosfomycin, 1 mg ml<sup>-1</sup> *t*-Cin, 5 mg ml<sup>-1</sup> tunicamycin, 15 mg ml<sup>-1</sup> D-cycloserine,  
201 60 mg ml<sup>-1</sup> nisin, 30 mg ml<sup>-1</sup> vancomycin, 5 mg ml<sup>-1</sup> moenomycin, 1 mg ml<sup>-1</sup> penicillin, 10 mg  
202 ml<sup>-1</sup> ampicillin and 250 mg ml<sup>-1</sup> bacitracin.

203

204 **2.5 Spot plating assays.** Overnight cultures of *L. monocytogenes* strains were adjusted to an  
205 OD<sub>600</sub> of 1 and serially diluted to 10<sup>-6</sup>. 5 µl of each dilution were spotted on BHI agar plates,  
206 BHI agar plates containing 0.5 M sucrose and 0.025 µg ml<sup>-1</sup> penicillin; 100 µg ml<sup>-1</sup> lysozyme;  
207 0.025 µg/ml moenomycin, 500 µl DMSO, 0.05 µg ml<sup>-1</sup> or 0.5 µg ml<sup>-1</sup> tunicamycin and plates  
208 incubated at 37°C unless otherwise stated. Where indicated, plates were supplemented with  
209 1 mM IPTG or 20 mM MgCl<sub>2</sub>. Images of plates were taken after 20-24 hours of incubation.

210

211 **2.6 Cell length analysis.** Overnight cultures of the indicated *L. monocytogenes* strains were  
212 inoculated to an OD<sub>600</sub> of 0.1 and grown to an OD<sub>600</sub> of 0.3-0.6 at 37°C with agitation in BHI  
213 medium or BHI medium containing 1 mM IPTG and the appropriate antibiotic. To stain the  
214 bacterial membranes, 800 µl of the bacterial cultures were mixed with 40 µl of 100 µg ml<sup>-1</sup> Nile  
215 red and incubated for 20 min at 37°C. The cells were washed twice in PBS buffer and  
216 subsequently re-suspended in the same buffer. Cells were then fixed in 1.12%  
217 paraformaldehyde for 20 min at room temperature in the dark and 1-1.5 µl of the cell  
218 suspension was spotted on microscope slides covered with a thin agarose layer (1.5% in  
219 ddH<sub>2</sub>O). Phase contrast and fluorescence images were taken using a Zeiss Axioskop 40  
220 microscope equipped with an EC Plan-NEOFLUAR 100X/1.3 objective (Carl Zeiss, Göttingen,  
221 Germany) and coupled to an AxioCam MRm camera. Filter set 43 was used for the detection  
222 of the Nile red signal. The images were processed using the Axio Vision software (release 4.7).  
223 The length of 50 cells per replicate was measured for each strain and the mean calculated.  
224 Statistical analysis was performed using the software GraphPad Prism (version 8).

225

226 **2.7 Isolation of cellular proteins and western blotting.** Bacteria from a 20 ml culture were  
227 harvested by centrifugation and washed with ZAP buffer (10 mM Tris-HCl, pH 7.5, 200 mM  
228 NaCl). The cells were subsequently resuspended in 1 ml ZAP buffer containing 1 mM PMSF  
229 and disrupted by sonication. Cellular debris was removed by centrifugation, the resulting  
230 supernatant collected and separated by SDS polyacrylamide gel electrophoresis (PAGE).  
231 Proteins were transferred onto positively charged polyvinylidene fluoride (PVDF) membranes  
232 using a semi-dry transfer unit. MurA was detected using a polyclonal rabbit antiserum raised  
233 against the *B. subtilis* MurAA protein (Kock et al., 2004), which also cross reacts with the *L.*  
234 *monocytogenes* MurA protein, as primary antibody and an anti-rabbit immunoglobulin G  
235 conjugated to horseradish peroxidase antibody as the secondary antibody. Blots were  
236 developed using ECL chemiluminescence reagents (Thermo Scientific) and imaged using a  
237 chemiluminescence imager (Vilber Lourmat).

238

239 **2.8 Cytochrome C binding assay.** Cytochrome C binding assays were performed as  
240 previously described (Kang et al., 2015). Briefly, overnight cultures of *L. monocytogenes* were

241 used to inoculated fresh cultures to an OD<sub>600</sub> of 0.05 in 4 ml BHI medium and the cultures were  
242 grown to an OD<sub>600</sub> of 0.6-0.8 at 37°C and 200 rpm. Bacteria from 2 ml of the culture were  
243 harvested by centrifugation at 16.200 x g for 1 min. Cells were then washed twice with 20 mM  
244 MOPS (3-(N morpholino) propanesulfonic acid) buffer (pH 7) and adjusted to an OD<sub>600</sub> of 0.25  
245 in the same buffer. Cytochrome C was added at a final concentration of 50 µg ml<sup>-1</sup> and the  
246 suspension was incubated in the dark for 10 min at room temperature. The suspension was  
247 centrifuged for 5 min at 16.200 x g, the supernatant removed and the absorbance of the  
248 supernatant was measured at 410 nm (OD<sub>410</sub> + cells). A reaction without cells was used as  
249 blank (OD<sub>410</sub> – cells). The percentage of bound cytochrome C was calculated as follows:

$$\% \text{ cytochrome C bound} = 100 - [(OD_{410} + \text{cells}) / (OD_{410} - \text{cells})]$$

251

252 **2.9 β-galactosidase assay.** To compare the *dlt* promoter activity of the *L. monocytogenes*  
253 wildtype and suppressor strain ANG5746, β-galactosidase assays were performed. For this  
254 purpose, promoter-*lacZ* fusions were integrated into the *amyE* locus of *B. subtilis* 168. The  
255 resulting *B. subtilis* strains were grown in CSE-glucose minimal medium at 37°C to an OD<sub>600</sub>  
256 of 0.5-0.8, bacteria from a culture aliquot harvested and the β-galactosidase activity  
257 determined as described previously (Miller, 1972).

258

### 259 3. RESULTS

#### 260 3.1 Δ*es/B* phenotypes are restored in the presence of excess Mg<sup>2+</sup>

261 The *es/ABCR* operon encodes the putative ABC transporter EslABC and the RpiR  
262 transcriptional regulator EslR. Absence of the transmembrane component EslB leads to a  
263 multitude of phenotypes including a cell division defect, decreased lysozyme resistance, the  
264 production of a thinner cell wall and a growth defect in media containing high sugar  
265 concentrations (Rismondo et al., 2021b). In addition, we observed that the growth of the *es/B*  
266 mutant is severely affected when grown on BHI plates at 42°C (Fig. 3A). So far, the cellular  
267 function of the transporter EslABC and how it is mechanistically linked to cell division and cell  
268 wall biosynthesis in *L. monocytogenes* is unknown. Generally, many cell wall defects can be  
269 rescued by the addition of Mg<sup>2+</sup>, however, the reason for this is still debated. Recently, it was  
270 speculated that binding of Mg<sup>2+</sup> to the cell wall inhibits peptidoglycan hydrolases and thereby  
271 stabilizes the bacterial cell wall (Tesson et al., 2022). As the phenotypic defects of the *es/B*  
272 mutant suggest that peptidoglycan biosynthesis might be impaired, we speculated that the  
273 addition of Mg<sup>2+</sup> should rescue the growth of this strain. To test this hypothesis, the *L.*  
274 *monocytogenes* wildtype 10403S, the Δ*es/B* mutant and the Δ*es/B* complementation strain  
275 were grown on BHI plates containing sucrose and penicillin, lysozyme or were incubated at  
276 42°C in the absence or presence of 20 mM MgCl<sub>2</sub>. The addition of Mg<sup>2+</sup> could restore the



277 growth of the  $\Delta es/B$  mutant under all conditions tested (Fig. S1), further supporting the  
278 hypothesis that peptidoglycan biosynthesis is impaired in *L. monocytogenes* cells lacking EslB.  
279

### 280 **3.2 Resistance profile of the *es/B* mutant towards cell wall-targeting antibiotics**

281 To narrow down which point of the peptidoglycan biosynthesis pathway is impaired in  
282 the *es/B* mutant, we performed disk diffusion assays with antibiotics that target different steps  
283 of this pathway (Fig. 1). Compared to the wildtype, the *es/B* mutant was more sensitive towards  
284 *t*-Cin and fosfomycin (Fig. 2), which target the UDP-GlcNAc biosynthetic pathway and MurA,  
285 respectively (Marquardt et al., 1994; Pensinger et al., 2021; Sun et al., 2021). In contrast, the  
286 resistance towards D-cycloserine, nisin, vancomycin, moenomycin, penicillin, ampicillin and  
287 bacitracin (Fig. 1), which target processes downstream of MurA, was not altered in the *es/B*  
288 mutant (Fig. S2). The *es/B* mutant was more resistant towards tunicamycin, whose main target  
289 at low concentrations is TarO, the first enzyme functioning in the WTA biosynthesis pathway.  
290 As we have seen above, the inhibition of WTA biosynthesis seems to be beneficial for the *es/B*  
291 mutant likely due to an increased flux of UDP-GlcNAc towards peptidoglycan biosynthesis.  
292 This antibiotic screen therefore suggests that one of the limiting factors of the *es/B* mutant  
293 might be the synthesis or correct distribution of UDP-GlcNAc, a precursor, which is used for  
294 both peptidoglycan biosynthesis and the synthesis and modification of WTA. This hypothesis  
295 is supported by the observation that overproduction of GlmM and GlmR, two proteins involved  
296 in the production of UDP-GlcNAc, can partially suppress the *es/B* phenotypes (Fig. S3).

297

### 298 **3.3 Isolation of *es/B* suppressor mutants**

299 To gain insights into the function of EslABC, we took advantage of the observation that  
300 the *es/B* mutant forms suppressors when grown on BHI plates that contain either 100  $\mu\text{g ml}^{-1}$   
301 lysozyme, or 0.5 M sucrose and 0.025 or 0.05  $\mu\text{g ml}^{-1}$  penicillin. Genomic alterations present  
302 in independently isolated *es/B* suppressors were determined by whole genome sequencing. A  
303 large subset of *es/B* suppressors had mutations in *walR* (*Imo0287*) or *walK* (*Imo0288*), which  
304 encode the WalRK two-component system that is involved in cell wall metabolism (Dubrac et  
305 al., 2008; Howell et al., 2003). In addition, we identified mutations that mapped to genes  
306 associated with peptidoglycan biosynthesis (*murZ* (*Imo2552*), *reoM* (*Imo1503*), *prpC*  
307 (*Imo1821*), *pbpA1* (*Imo1892*)), peptidoglycan hydrolysis (*cwlO* (*Imo2505*), *spl*), *ftsX* (*Imo2506*),  
308 *ftsE* (*Imo2507*)) and wall teichoic acid (WTA) biosynthesis and modification (*tarL* (*Imo1077*),  
309 *dltX* (promoter region, *Imrg\_02074*)) (Table 1).

310

### 311 **3.4 Suppression of *es/B* phenotypes by increased MurA levels**

312 Under sucrose penicillin stress, two *es/B* suppressors with mutations in *murZ* and one  
313 *es/B* suppressor with a mutation in *reoM* or *prpC* were isolated. The proteins encoded by all

314 three of these genes affect MurA protein levels (Wamp et al., 2022, 2020). Drop dilution assays  
315 were performed to assess, whether mutations in *murZ*, *reoM* and *prpC* suppress the growth  
316 defect of the *es/B* mutant in the presence of sucrose and penicillin as well as other conditions  
317 under which the growth of the *es/B* mutant is severely affected. As expected, the growth of the  
318 *L. monocytogenes* strains 10403S $\Delta$ *es/B*<sub>(1)</sub> *murZ*<sup>M240fs</sup>, 10403S $\Delta$ *es/B*<sub>(2)</sub> *murZ*<sup>Q307fs</sup>,  
319 10403S $\Delta$ *es/B*<sub>(1)</sub> *reoM*<sup>K23fs</sup> and 10403S $\Delta$ *es/B*<sub>(2)</sub> *prpC*<sup>P159L</sup> on BHI plates containing sucrose and  
320 penicillin is comparable to the wildtype strain 10403S. The suppressors with mutations in *murZ*,  
321 *reoM* and *prpC* also grew like wild-type on BHI plates containing lysozyme as well as on BHI  
322 plates that were incubated at 42°C (Fig. 3A, data not shown).

323 MurZ is a homolog of the UDP-*N*-acetylglucosamine 1-carboxyvinyltransferase MurA,  
324 which is required for the first step of peptidoglycan biosynthesis (Fig. 1)(Du et al., 2000; Kock  
325 et al., 2004). While MurA is essential for the growth of *L. monocytogenes*, the deletion of *murZ*  
326 is possible and results in the stabilization of MurA (Rismondo et al., 2016). MurA is a substrate  
327 of the ClpCP protease and a recent study showed that ReoM is required for the ClpCP-  
328 dependent proteolytic degradation of MurA in *L. monocytogenes* (Rismondo et al., 2016;  
329 Wamp et al., 2020). The activity of ReoM is controlled by the serine/threonine kinase PrkA and  
330 the cognate phosphatase PrpC. The phosphorylated form of ReoM stimulates peptidoglycan  
331 biosynthesis by preventing ClpCP-dependent degradation of MurA, while MurA degradation is  
332 enhanced in the presence of non-phosphorylated ReoM (Wamp et al., 2022, 2020). The  
333 identified mutations in *murZ* and *reoM* in our suppressor strains lead to frameshifts, and thus  
334 to the production of inactive MurZ and ReoM proteins. It has been previously shown that MurA  
335 protein levels are increased in *murZ* and *reoM* mutants (Rismondo et al., 2016; Wamp et al.,  
336 2020) and we thus assume that this is also the case for the *es/B* suppressor strains  
337 10403S $\Delta$ *es/B*<sub>(1)</sub> *murZ*<sup>M240fs</sup>, 10403S $\Delta$ *es/B*<sub>(2)</sub> *murZ*<sup>Q307fs</sup> and 10403S $\Delta$ *es/B*<sub>(1)</sub> *reoM*<sup>K23fs</sup>. The  
338 identified mutation in *prpC* in the suppressor strain 10403S $\Delta$ *es/B*<sub>(2)</sub> *prpC*<sup>P159L</sup> leads to the  
339 production of a variant of PrpC, in which proline at position 159 is replaced by a leucine,  
340 however, it is currently not known whether this amino acid exchange leads to decreased or  
341 enhanced activity of PrpC. A decreased activity of PrpC would lead to accumulation of MurA  
342 (Wamp et al., 2022), while enhanced activity would result in reduced MurA levels. To assess  
343 which affect the P159L mutation in *prpC* has on MurA levels, western blots were performed  
344 using a MurAA-specific antibody. Protein samples of *L. monocytogenes* strains EGD-e and  
345 EGD-e  $\Delta$ *clpC* were used as controls. In accordance with previous studies, MurA accumulated  
346 in the *clpC* mutant (Rismondo et al., 2016). The production of the mutated PrpC variant,  
347 PrpC<sup>P159L</sup>, also led to a slight accumulation of MurA in the *es/B* mutant background (Fig. 3B).  
348 Additionally, no change in MurA levels could be observed for the *es/B* mutant compared to the  
349 wildtype strain 10403S (Fig 3B). These results suggest that while the decrease in

350 peptidoglycan production seen in the *es/B* mutant is not caused by decreased MurA levels, the  
351 growth deficit of the *es/B* mutant can be rescued by preventing MurA degradation.

352 To confirm that the suppression of the *es/B* phenotypes in the strains with mutations in  
353 *murZ*, *reoM* or *prpC* is indeed the result of increased MurA protein levels, we integrated a  
354 second, IPTG-inducible copy of *murA* into the genome of the *es/B* mutant. First, we determined  
355 the resistance towards fosfomycin, which is a known inhibitor of MurA (Fig. 4A-B)(Kahan et al.,  
356 1974), for the *L. monocytogenes* wildtype and the *es/B* mutant harboring the empty plasmid  
357 pIMK3 or pIMK3-*murA* in the presence of IPTG. Strain 10403S $\Delta$ *es/B* pIMK3 is three-fold more  
358 sensitive to fosfomycin as compared to the cognate wildtype strain. The induction of *murA*  
359 expression increases the resistance of strains 10403S pIMK3-*murA* and 10403S $\Delta$ *es/B* pIMK3-  
360 *murA* (Fig. 4A-B), suggesting that MurA is indeed overproduced in these strains.

361 Next, we assessed whether the growth phenotypes of the *es/B* mutant can be  
362 suppressed by the overexpression of *murA*. In the presence of the inducer IPTG, the growth  
363 of strain 10403S $\Delta$ *es/B* pIMK3-*murA* was comparable to the corresponding wildtype strain  
364 under all conditions tested (Fig. 4C). These results indicate that overproduction of MurA can  
365 compensate for the loss of *es/B* and that the suppression of the *es/B* phenotypes in the *murZ*,  
366 *reoM* and *prpC* suppressors is likely the result of increased MurA levels.

367 Interestingly, increased MurA production also leads to the suppression of the cell  
368 division defect of the *es/B* mutant. Cells of the *es/B* mutant carrying the empty pIMK3 plasmid  
369 have a cell length of  $3.19 \pm 0.29$   $\mu$ m. In contrast, strain 10403S $\Delta$ *es/B* pIMK3-*murA* produces  
370 cells with a length of  $2.27 \pm 0.03$   $\mu$ m, a size that is comparable to the length of *L. monocytogenes*  
371 wildtype cells (Fig. 4D-E).

372

### 373 **3.5 Suppression by reduction of the glycosyltransferase activity of PBP A1**

374 Multiple enzymes are involved in the production of lipid II, the peptidoglycan precursor,  
375 within the cytoplasm. After its transport across the membrane via MurJ, lipid II is incorporated  
376 into the growing glycan strand by glycosyltransferases, which can either be class A penicillin  
377 binding proteins (PBPs), monofunctional glycosyltransferases or members of the SEDS  
378 (shape, elongation, division, sporulation) family, such as RodA and FtsW (Cho et al., 2016;  
379 Emami et al., 2017; Meeske et al., 2016). *L. monocytogenes* encodes two class A PBPs, PBP  
380 A1 and PBP A2, in its genome (Korsak et al., 2010; Rismondo et al., 2015). One of the *es/B*  
381 suppressor strains, ANG5717, carries a point mutation in *pbpA1* leading to the substitution of  
382 glycine at position 125 by aspartate. Interestingly, this glycine residue is part of the catalytic  
383 site of the glycosyltransferase domain, suggesting that the glycosyltransferase activity of the  
384 PBP A1 variant PBP A1<sup>G125D</sup> might be reduced. Drop dilution assays and microscopic analysis  
385 revealed that the phenotypes associated with deletion of *es/B* can be rescued by *pbpA1*<sup>G125D</sup>  
386 (Fig. 5A-C). The glycosyltransferase activity of class A PBPs can be inhibited by moenomycin

387 (Huber and Neesemann, 1968). We thus tested whether the presence of moenomycin would  
388 enable the growth of the *es/B* mutant under heat stress. As shown in Figure 5D, the *es/B*  
389 mutant is unable to grow at 42°C on BHI plates or BHI plates containing DMSO, which was  
390 used to dissolve moenomycin. In contrast, nearly wildtype-like growth of the *es/B* mutant was  
391 observed on BHI plates that were supplemented with moenomycin. These results suggest that  
392 growth deficits of the *es/B* mutant can be rescued by the reduction of the glycosyltransferase  
393 activity of class A PBPs.

394

### 395 **3.6 Suppression by reducing *cw/O* expression or Cw/O activity**

396 In addition to suppressors associated with MurA and PBP A1, we isolated suppressors  
397 carrying mutations in genes that either affect the transcription of *cw/O* or the activity of Cw/O.  
398 Cw/O is a DL-endopeptidase, which opens the existing cell wall to allow for the insertion of  
399 new lipid II precursors during cell elongation of *B. subtilis* (Bisicchia et al., 2007; Hashimoto et  
400 al., 2012). In *B. subtilis*, transcription of *cw/O* is induced by WalRK in response to low DL-  
401 endopeptidase activity (Bisicchia et al., 2007; Dobihal et al., 2019; Dubrac et al., 2008) and  
402 Cw/O activity is stimulated by a direct interaction with the ABC transporter FtsEX (Meisner et  
403 al., 2013). In our suppressor screen, we isolated eight *es/B* suppressor strains that carried  
404 mutations in *walk*, which were either isolated under lysozyme or sucrose penicillin stress, and  
405 four *es/B* suppressor strains that carried mutations in *walR* from which the majority was isolated  
406 in the presence of lysozyme stress. We selected *es/B* suppressors 10403S $\Delta$ *es/B*<sub>(2)</sub> *walR*<sup>S216G</sup>  
407 and 10403S $\Delta$ *es/B*<sub>(2)</sub> *walk*<sup>H463D</sup>, which were isolated under lysozyme stress, and 10403S $\Delta$ *es/B*<sub>(2)</sub>  
408 *walk*<sup>I583T</sup>, which was isolated under sucrose penicillin stress, for further analysis. In addition,  
409 three suppressors with mutations were isolated in *ftsE*, *ftsX* and *cw/O* under sucrose penicillin  
410 pressure (Table 1).

411 Spot plating assays showed that the *es/B* suppressors with mutations in either *walR* or  
412 *walk* could overcome the growth defect of the *es/B* mutant under sucrose penicillin, lysozyme  
413 and heat stress (Fig. 6). In contrast, *es/B* suppressors harboring mutations in either *ftsE*, *ftsX*  
414 or *cw/O*, grow comparable to the wildtype under sucrose penicillin and heat stress, but showed  
415 a similar growth defect as the *es/B* mutant on plates containing lysozyme (Fig. 6A). Microscopic  
416 analysis of the *es/B* suppressors with mutations in *walR*, *walk*, *ftsE*, *ftsX* and *cw/O* revealed  
417 that these cells have a similar cell length to the *L. monocytogenes* wildtype 10403S and thus,  
418 the expression of mutated WalR, Walk, FtsE and Cw/O variants could restore the cell division  
419 defect of the *es/B* mutant (Fig. 6B-C). Additionally, we observed that the cells of suppressor  
420 strains 10403S $\Delta$ *es/B*<sub>(2)</sub> *cw/O*<sup>R106H</sup> and 10403S $\Delta$ *es/B*<sub>(2)</sub> *ftsE*<sup>Q220-</sup> were bent compared to the  
421 wildtype strain. This phenotype is characteristic for *B. subtilis* *cw/O* and *ftsE* mutants  
422 (Domínguez-Cuevas et al., 2013; Meisner et al., 2013) suggesting that the acquired mutations  
423 in *cw/O* and *ftsE* led to inactivation or reduced activity of Cw/O and FtsE in *L. monocytogenes*.

424 The observation that mutations accumulate in genes associated with CwIO led to the  
425 hypothesis that wildtype CwIO activity is toxic, due to the reduced peptidoglycan levels  
426 produced by the *esIB* mutant (Rismondo et al., 2021b). To confirm this hypothesis, an *esIB*  
427 *cwIO* double mutant was constructed, in which the expression of an ectopic copy of *cwIO* was  
428 placed under the control of an IPTG-inducible promoter. As expected, in the absence of the  
429 inducer, the *esIB cwIO* double mutant was able to grow on BHI plates supplemented with  
430 sucrose and penicillin. In accordance to the results obtained for the suppressors, the growth  
431 of a strain lacking both, EsIB and CwIO, was still impaired in the presence of lysozyme.  
432 Furthermore, individual deletion of either *esIB* or *cwIO* resulted in a severe growth defect at  
433 higher temperatures, while the *esIB cwIO* double mutant was able to grow in the absence of  
434 IPTG at 42°C. Induction of *cwIO* expression in strain 10403S $\Delta$ *cwIO*  $\Delta$ *esIB* pIMK3-*cwIO* resulted  
435 in a growth defect under sucrose penicillin and under heat stress, which is comparable to that  
436 of the *esIB* mutant (Fig. 7A). Next, we studied the cell morphology of strains lacking CwIO,  
437 EsIB or both. In accordance with previous studies investigating the function of CwIO in *B.*  
438 *subtilis* (Domínguez-Cuevas et al., 2013; Meisner et al., 2013), the *L. monocytogenes cwIO*  
439 mutant formed slightly smaller, bent cells (Fig.7B-C). Cells lacking both, EsIB and CwIO, were  
440 also shorter than cells of the *L. monocytogenes* wildtype 10403S, while induction of *cwIO*  
441 expression in strain 10403S $\Delta$ *cwIO*  $\Delta$ *esIB* pIMK3-*cwIO* resulted in the formation of elongated  
442 cells (Fig. 7B-C). Altogether, these findings support our hypothesis that the suppression of the  
443 *esIB* phenotypes in the *cwIO*, *ftsE* and *ftsX* suppressors is the result of an inactivation of the  
444 DL-endopeptidase CwIO.

445

### 446 3.7 Suppression by inhibition of WTA biosynthesis

447 In *B. subtilis*, WalRK does not only stimulate transcription of *cwIO*, but also of the *tagAB*  
448 and *tagDEFGH* operons, which encode proteins required for WTA biosynthesis and export  
449 (Howell et al., 2003). In *L. monocytogenes* 10403S, WTA is composed of a ribitol phosphate  
450 backbone, which is attached to a Glc-Glc-glycerol phosphate-GlcNAc-ManNAc linker unit and  
451 modified with GlcNAc, rhamnose and D-alanine residues (Brown et al., 2013; Shen et al.,  
452 2017). Thus, UDP-GlcNAc is consumed by several enzymes during WTA biosynthesis and  
453 modification. As mentioned above, we isolated suppressors containing mutations in *Imo1077*,  
454 encoding a TarL homolog, and the promoter region of the *dlt* operon (Table 1). TarL is a  
455 teichoic acid ribitol phosphate polymerase required for the polymerization of the ribitol  
456 phosphate backbone of WTA (Fig. 1)(Brown et al., 2013). The *dlt* operon codes for proteins  
457 that are essential for the D-alanylation of WTA (Neuhaus and Baddiley, 2003; Perego et al.,  
458 1995; Rismondo et al., 2021a). Figure 8A shows that the *esIB* mutant, which harbors a  
459 mutation in *tarL*, could grow again under sucrose penicillin and lysozyme stress, likely due to  
460 a reduction in WTA biosynthesis and potentially leading to an increase in the cellular UDP-

461 GlcNAc pool, which can then be used by MurA. However, the *tarL* suppressor is unable to  
462 grow at 42°C. A similar phenotype could be observed when the *L. monocytogenes* wildtype  
463 strain 10403S is grown at 42°C on a plate containing high concentrations of tunicamycin, which  
464 inhibits TarO, the first enzyme required for WTA biosynthesis (data not shown). This indicates  
465 that the mutated TarL variant produced by the *es/B* suppressor strain ANG5729 has a reduced  
466 activity. To further test if inhibition of WTA biosynthesis is indeed beneficial for the *es/B* mutant,  
467 we grew the *es/B* mutant at 42°C on BHI plates containing different concentrations of  
468 tunicamycin. We could see partial suppression of the heat sensitivity at a tunicamycin  
469 concentration of 0.05 µg/ml and the *es/B* mutant grew comparable to the *L. monocytogenes*  
470 wildtype strain 10403S and the complementation strain on plates containing 0.5 µg/ml  
471 tunicamycin (Fig. S4). These results demonstrate that reduction of WTA biosynthesis leads to  
472 the suppression of the heat phenotype associated of the *es/B* mutant.

473 Figure 8A further shows that the *es/B* suppressor strain, which harbors a mutation in the  
474 *dlt* promoter region, could grow again under all conditions tested. To assess what consequence  
475 the point mutation in the promoter region of the *dlt* operon has on gene expression, we place  
476 the promoterless *lacZ* gene under the control of the *dlt* promoter or the mutated *dlt* promoter  
477 found in suppressor strain ANG5746. The *lacZ* promoter gene fusions were introduced into *B.*  
478 *subtilis* and β-galactosidase activities determined. This analysis showed that the mutation in  
479 the *dlt* promoter resulted in increased promoter activity and likely increased D-alanylation of  
480 teichoic acids in the suppressor strain (Fig. 8B). The D-alanylation state of teichoic acids is an  
481 important factor that impacts the bacterial cell surface charge (Vadyvaloo et al., 2004). As we  
482 isolated a suppressor that increased the expression of the *dlt* operon, we wondered, whether  
483 the surface charge of *es/B* mutant cells is altered. To test this, we determined the binding  
484 capability of positively charged cytochrome C to the cell surface of different *L. monocytogenes*  
485 strains, which serves as a readout of the bacterial surface charge (Peschel et al., 1999; Wecke  
486 et al., 1997). A strain lacking D-alanine residues on LTA and WTA due to a deletion of *dltA* was  
487 used as a control. As expected, the cell surface of the *dltA* mutant had a higher negative charge  
488 as compared to the *L. monocytogenes* wildtype strain 10403S. A similar result was observed  
489 for the *es/B* mutant. The high negative surface charge of the *es/B* mutant could be partially  
490 rescued by the mutation in the *dlt* promoter, which is present in the *es/B* suppressor strain  
491 10403SΔ*es/B* P<sub>*dlt*</sub>\* (Fig. 8C). This result suggests that either the D-alanylation state of WTAs is  
492 altered in the absence of EsIB or that the surface presentation of WTA is changed due to the  
493 production of a thinner peptidoglycan layer.

494

#### 495 **4. DISCUSSION**

496 In this study, we aimed to provide further insight into the connection between the  
497 predicted ABC transporter EsIABC and peptidoglycan biosynthesis. Previous studies have

498 shown that the deletion of *esIB*, coding for one of transmembrane components of the  
499 transporter, leads to a growth defect on sucrose containing media, the formation of elongated  
500 cells, the production of a thinner peptidoglycan layer, as well as sensitivity towards the natural  
501 antibiotic lysozyme and cationic antimicrobial peptides (Burke et al., 2014; Durack et al., 2015;  
502 Rismondo et al., 2021b), suggesting its involvement in peptidoglycan biosynthesis and cell  
503 division. It was proposed that the addition of  $Mg^{2+}$  rescues mutants with a defect in  
504 peptidoglycan biosynthesis by reducing the activity of peptidoglycan hydrolases (Tesson et al.,  
505 2022). In accordance with this, we observed a suppression of the *esIB* growth deficits under  
506 all conditions tested when an excess of  $Mg^{2+}$  was added. *L. monocytogenes* encodes several  
507 peptidoglycan hydrolases, including the DL-endopeptidase CwIO (Spl), the LytM-domain  
508 containing protein Lmo2504 and the two cell wall hydrolases NamA and CwhA (p60), which  
509 are required for daughter cell separation (Carroll et al., 2003; Pilgrim et al., 2003). We have  
510 isolated several *esIB* suppressors, which carry mutations in *cwIO* or mutations in other genes,  
511 e.g. *ftsE* or *ftsX*, which affect CwIO activity. After depletion of CwIO, the *esIB* mutant was able  
512 to grow in otherwise non-permissive conditions, suggesting that the activity of CwIO might be  
513 deregulated in the *esIB* deletion strain or that the peptidoglycan of the *esIB* mutant is more  
514 sensitive to hydrolysis by CwIO. CwIO activity is controlled by a direct protein-protein  
515 interaction with the ABC transporter FtsEX (Meisner et al., 2013). It is thus tempting to  
516 speculate that the ABC transporter EslABC might also affect CwIO activity or localization of  
517 proteins involved in peptidoglycan biosynthesis and/or degradation. Interestingly, a strain  
518 lacking both EslB and CwIO is able to grow at elevated temperatures, while both single mutants  
519 are not able to grow under this condition.

520 We could isolate *esIB* suppressor strains with mutations that are associated with  
521 stabilization of MurA, the UDP-GlcNAc 1-carboxyvinyltransferase responsible for the first step  
522 of peptidoglycan biosynthesis. Elevated levels of MurA, and thus, enhanced peptidoglycan  
523 biosynthesis could fully restore the phenotypic defects of the 10403S $\Delta$ *esIB* strain. To identify  
524 the exact process of peptidoglycan biosynthesis, which is impaired in the *esIB* mutant, we  
525 performed a screen with antibiotics targeting different steps of this process. The absence of  
526 *esIB* only affected the resistance towards *t*-Cin and fosfomycin, which reduce the synthesis of  
527 UDP-GlcNAc and inhibit MurA, respectively (Marquardt et al., 1994; Pensinger et al., 2021;  
528 Sun et al., 2021). Surprisingly, we observed an increased resistance of the *esIB* mutant  
529 towards tunicamycin. The primary target of tunicamycin is TarO, the first enzyme of WTA  
530 biosynthesis, and, at high concentrations, also MraY, which is responsible for the production  
531 of lipid I during peptidoglycan biosynthesis (Fig. 1)(Campbell et al., 2011; Hakulinen et al.,  
532 2017; Price and Tsvetanova, 2007; Watkinson et al., 1971). During WTA biosynthesis, UDP-  
533 GlcNAc is used for the synthesis of the linker unit and for the modification of the WTA backbone  
534 (Eugster et al., 2015; Rismondo et al., 2018; Shen et al., 2017). Thus, reducing the production

535 of WTA could increase the availability of UDP-GlcNAc for peptidoglycan biosynthesis and  
536 therefore support the growth of the *eslB* mutant under non-permissive conditions. In  
537 accordance with this, we observed a partial suppression of the *eslB* phenotypes by the  
538 overproduction of GlmM and GlmR, two enzymes required for the synthesis of UDP-GlcNAc  
539 (Pensing et al., 2021). These results suggest that either the production or distribution of UDP-  
540 GlcNAc as a substrate between different pathways might be disturbed in the *eslB* mutant.

541 Cell wall stability depends on the balance between peptidoglycan biosynthesis and  
542 hydrolysis. An imbalance of one of these processes results in rapid cell lysis (Sassine et al.,  
543 2020). Recent studies suggest that new peptidoglycan precursors are inserted into the growing  
544 glycan chains by the Rod system, which is composed of several enzymes. In contrast, class A  
545 PBPs are thought to fill gaps and/or repair cell wall defects (Cho et al., 2016; Dion et al., 2019;  
546 Vigouroux et al., 2020). It was recently shown that enhanced endopeptidase activity leads to  
547 the activation of class A PBPs in *E. coli* (Lai et al., 2017). A similar mechanism seems to exist  
548 in *B. subtilis*, as either inactivation of PBP1 or inhibition of peptidoglycan hydrolases by the  
549 addition of Mg<sup>2+</sup> suppresses growth and morphological defects of an *mreB* mutant (Tesson et  
550 al., 2022). In accordance with this, we also observed suppression of the heat sensitivity of the  
551 *eslB* mutant in presence of moenomycin, which specifically inhibits the glycosyltransferase  
552 activity of class A PBPs (Ostash and Walker, 2010; Van Heijenoort et al., 1978).

553 In our suppressor screen, we identified a strain carrying a mutation in the *dlt* promoter  
554 region, which leads to an overproduction of the Dlt enzymes. These enzymes are required for  
555 the modification of teichoic acids (TAs) with D-alanines (Neuhaus and Baddiley, 2003; Percy  
556 and Gründling, 2014; Rismondo et al., 2021a). The modification of TAs with D-alanine residues  
557 leads to a reduction in the negative surface charge and affects the activity of peptidoglycan  
558 hydrolases (Brown et al., 2013; Tesson et al., 2022; Vadyvaloo et al., 2004). Furthermore, lack  
559 of D-alanine modifications of TAs was shown to increase lysozyme sensitivity in  
560 *Staphylococcus aureus* (Herbert et al., 2007). Interestingly, the cell surface of the *eslB* mutant  
561 is more negatively charged, similar to that of a strain lacking D-alanine modifications on TAs.  
562 Based on our results, we propose the following model: The absence of *EsIB* seems to affect  
563 the production and/or distribution of UDP-GlcNAc between different pathways, leading to the  
564 production of a thinner peptidoglycan layer. The reduced peptidoglycan thickness could  
565 subsequently result in the presentation of a larger portion of WTA on the bacterial cell surface,  
566 which would explain the higher negative surface charge (Fig. 9). This higher negative surface  
567 charge would enhance the binding capability and/or activity of cationic antimicrobial peptides,  
568 lysozyme as well as peptidoglycan hydrolases (Low et al., 2011; Neuhaus and Baddiley, 2003;  
569 Ragland and Criss, 2017; Steudle and Pleiss, 2011; Weidenmaier et al., 2003) and furthermore  
570 explain the sensitivity of the *eslB* mutant towards CwIO activity, lysozyme and cationic  
571 antimicrobial peptides (Burke et al., 2014; Rismondo et al., 2021b).



572           The essential two-component system WalRK stimulates the transcription of several  
573 peptidoglycan hydrolases in Gram-positive bacteria (Delaune et al., 2011; Delauné et al., 2012;  
574 Dubrac et al., 2008; Dubrac and Msadek, 2004; Howell et al., 2003). In *B. subtilis*, WalRK also  
575 regulates the expression of genes involved in WTA biosynthesis and export (Howell et al.,  
576 2003). The regulon of the WalRK system has not yet been determined for *L. monocytogenes*,  
577 however, it was shown that the system is essential (Fischer et al., 2022). Inactivation of WalRK  
578 usually leads to cell death of wildtype cells due to loss of peptidoglycan hydrolase activity,  
579 however, cell death could be prevented by the inhibition of peptidoglycan biosynthesis  
580 (Salamaga et al., 2021). We have isolated several *es/B* suppressors with mutations in *walR*  
581 and *walK*. As it is unlikely that all of these mutations are gain-of-function mutations, we  
582 hypothesize that these mutations result in a reduced activity of the WalRK system. This would  
583 lead to a reduced peptidoglycan hydrolase activity as well as a reduction in WTA content, and  
584 reduction of the latter would at least partially restore the bacterial cell surface charge of the  
585 *es/B* mutant.

586           Taken together, we could show that the lack of *EsiB* results in a defect in peptidoglycan  
587 biosynthesis, which can be suppressed by modulating the activity of enzymes involved in either  
588 peptidoglycan biosynthesis or hydrolysis. Our results suggest that the production or distribution  
589 of the peptidoglycan precursor UDP-GlcNAc between different pathways might be disturbed in  
590 the *es/B* mutant. Further studies are required to prove this hypothesis and to determine the  
591 function of the ABC transporter *EsiABC*.

592

#### 593 **AUTHOR CONTRIBUTION STATEMENT:**

594 **Lisa Maria Schulz:** Conceptualization, Funding acquisition, Investigation, Data analysis,  
595 Visualization, Writing – review & editing. **Patricia Rothe:** Investigation. **Sven Halbedel:**  
596 Supervision, Writing – review & editing. **Angelika Gründling:** Conceptualization, Funding  
597 acquisition, Writing – review & editing. **Jeanine Rismondo:** Conceptualization, Funding  
598 acquisition, Investigation, Data analysis, Visualization, Writing – original draft preparation.

599

#### 600 **ACKNOWLEDGEMENTS**

601 We thank Ivan Andrew and Jaspreet Haywood from the CSC Genomics Laboratory,  
602 Hammersmith Hospital, for their help with the whole genome sequencing and Annika Gillis for  
603 help with genome sequence analysis. We also thank Julia Busse for technical assistance and  
604 Tayfun Acar for the help with some experiments. We are grateful to Prof. Jörg Stülke for  
605 providing JR and LMS with laboratory space, equipment and consumables and to the  
606 Göttingen Center for Molecular Biosciences (GZMB) for financial support. This work was  
607 funded by the Wellcome Trust grant 210671/Z/18/Z and MRC grant MR/P011071/1 to AG, the  
608 German research foundation (DFG) grants RI 2920/1-1, RI 2920/2-1 and RI 2920/3-1 to JR,

609 HA 6830/4 to SH. LMS was supported by the Göttingen Graduate School for Neurosciences,  
 610 Biophysics, and Molecular Biosciences (GGNB, DFG grant GSC226/4).

611

612 **FIGURES AND FIGURE LEGENDS**

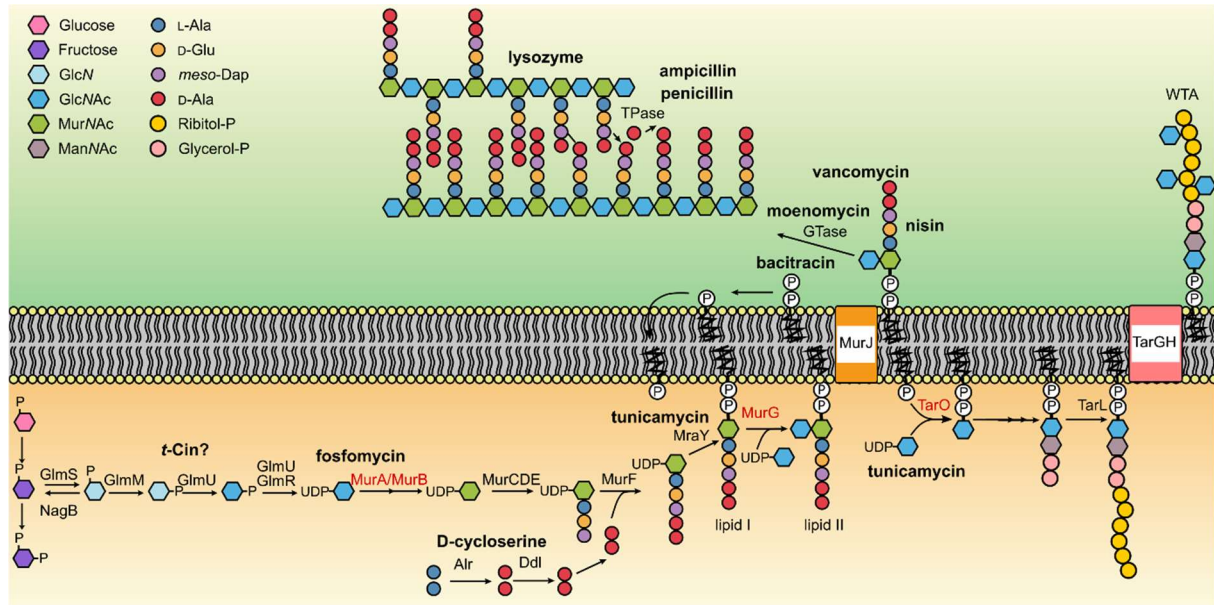

613

614 **Figure 1: Schematic of the UDP-GlcNAc, peptidoglycan and wall teichoic acid**  
 615 **biosynthesis pathway.** UDP-GlcNAc, which is required for peptidoglycan and wall teichoic  
 616 acid (WTA) biosynthesis, is synthesized from Fructose-6-phosphate in a four-step reaction  
 617 catalyzed by GlmS, GlmM, GlmU and GlmR. MurA, an UDP-GlcNAc-1-  
 618 carboxyvinyltransferase catalyzing the first step of peptidoglycan biosynthesis, and MurB  
 619 convert UDP-GlcNAc to UDP-MurNAc. Lipid II is produced in subsequent steps, which are  
 620 performed by MurCDEF, Alr, Ddl, MraY and MurG, flipped across the membrane by MurJ and  
 621 inserted into the growing glycan strand by glycosyltransferases (GTases). Finally,  
 622 peptidoglycan is crosslinked by the action of transpeptidases (TPases) (Pazos and Peters,  
 623 2019). UDP-GlcNAc also serves as a substrate of TarO, the first enzyme of the WTA  
 624 biosynthesis pathway. After the WTA polymer is synthesized by a subset of enzymes, it is  
 625 transported across the membrane via TarGH (Brown et al., 2013) and, in case of *L.*  
 626 *monocytogenes* 10403S, decorated with GlcNAc residues (Shen et al., 2017). UDP-GlcNAc-  
 627 consuming enzymes are labelled in red. Antibiotics targeting different steps of the UDP-  
 628 GlcNAc, peptidoglycan and WTA biosynthesis pathways or degrade peptidoglycan are  
 629 depicted in bold (Campbell et al., 2011; Pensinger et al., 2021; Sarkar et al., 2017).

630

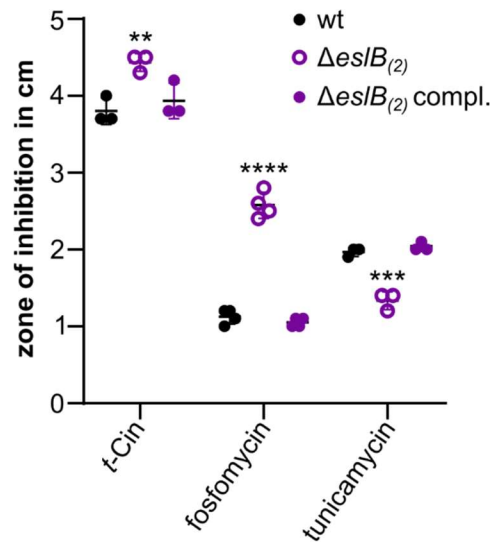

631

632 **Figure 2: Alterations in the resistance of the *eslB* mutant towards cell wall-targeting**  
633 **antibiotics.** Disk diffusion assay. *L. monocytogenes* strains 10403S (wt),  $\Delta eslB_{(2)}$  and  $\Delta eslB_{(2)}$   
634 compl. were spotted on BHI plates. Antibiotic-soaked disks placed on top the agar surface and  
635 the plates incubated for 24h at 37°C. The inhibition zones for the indicated strains were  
636 measured and the average values and standard deviation of at least three independent  
637 experiments were plotted. For statistical analysis, a one-way ANOVA coupled with a Dunnett's  
638 multiple comparison test was used (\*\*  $p \leq 0.01$ , \*\*\*  $p \leq 0.001$ , \*\*\*\*  $p \leq 0.0001$ ).

639

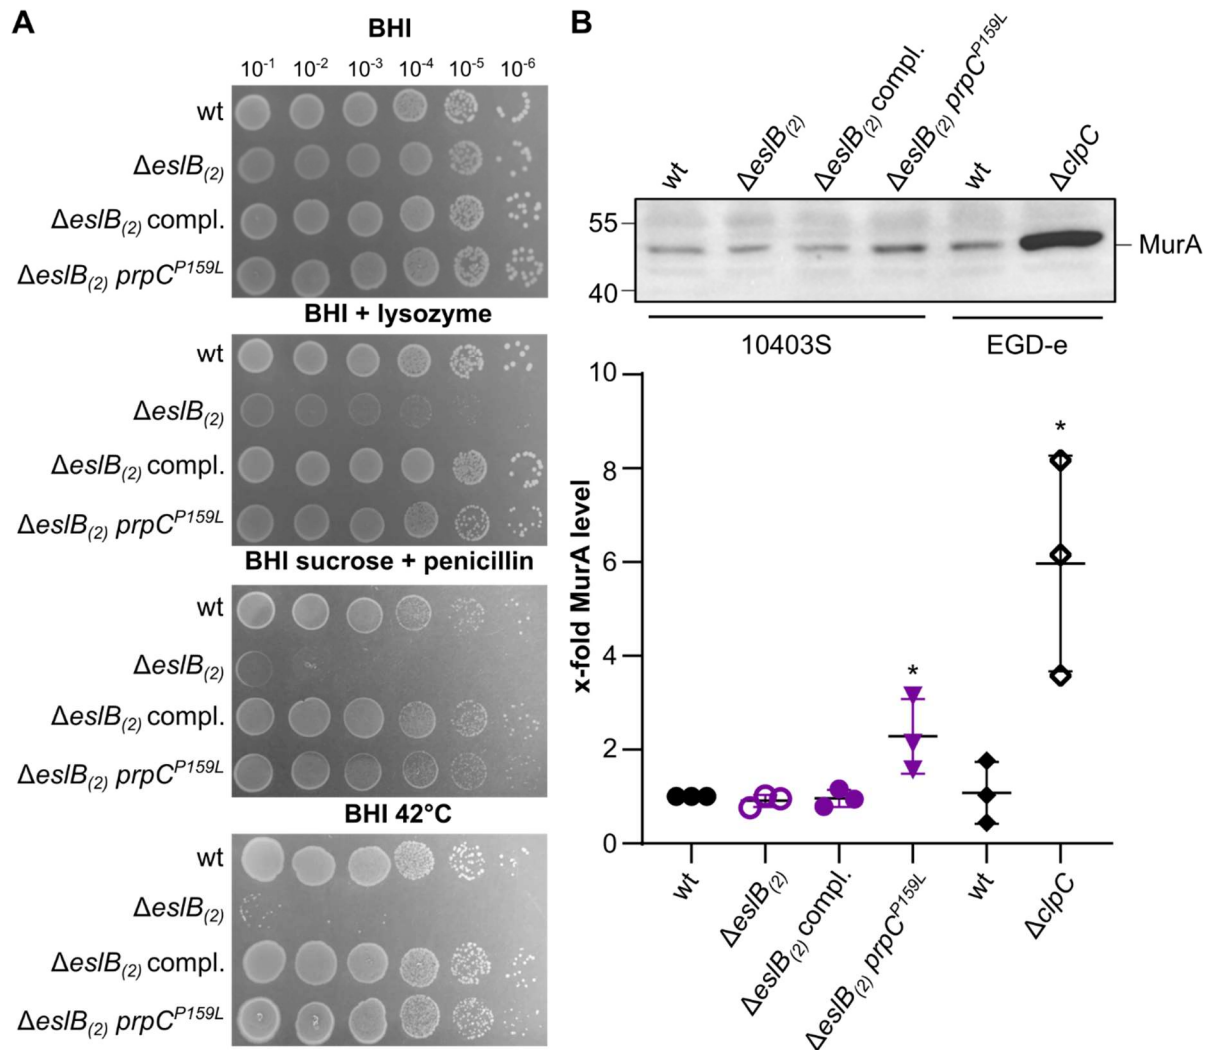

640

641 **Figure 3: Mutation P159L in *prpC* suppresses *esIB* phenotypes.** (A) Drop dilution assay.  
 642 Dilutions of *L. monocytogenes* strains 10403S (wt),  $\Delta esIB_{(2)}$ ,  $\Delta esIB_{(2)}$  compl., and  $\Delta esIB_{(2)}$   
 643 *prpC*<sup>P159L</sup> were spotted on BHI plates, BHI plates containing 100  $\mu$ g/ml lysozyme or containing  
 644 0.5 M sucrose and 0.025  $\mu$ g/ml penicillin G and were incubated at 37°C or on BHI plates and  
 645 were incubated at 42°C. (B) Western blot. Protein samples of strains 10403S,  $\Delta esIB_{(2)}$ ,  $\Delta esIB_{(2)}$   
 646 compl. and  $\Delta esIB_{(2)}$  *prpC*<sup>P159L</sup> were separated by SDS PAGE and transferred to a PVDF  
 647 membrane. MurA was detected using a MurAA-specific antibody as described in the methods  
 648 section. Protein samples of *L. monocytogenes* wildtype strain EGD-e and a *clpC* mutant were  
 649 used as controls. MurA level in the protein samples were quantified and plotted. For statistical  
 650 analysis, an unpaired two-tailed t-test was used (\*  $p \leq 0.05$ ).

651

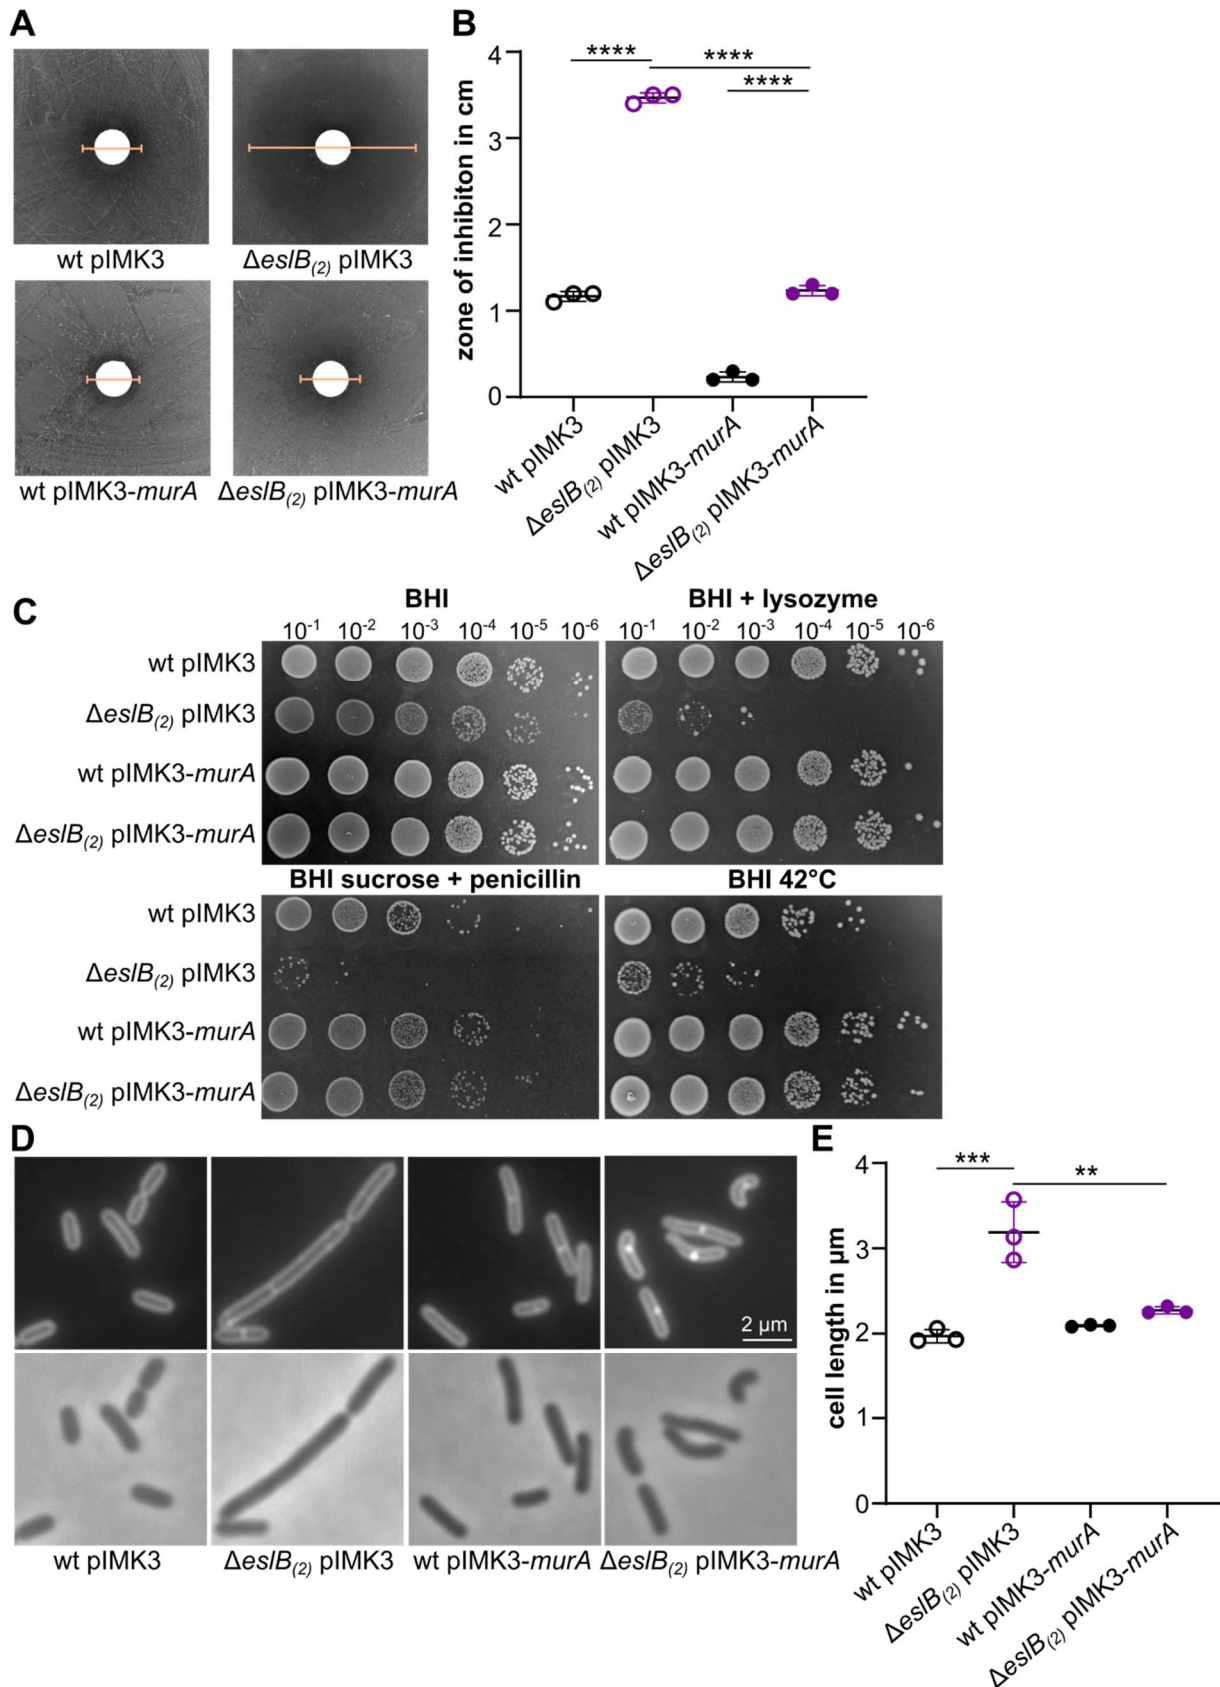

652

653 **Figure 4: MurA overexpression leads to suppression of *eslB* phenotypes.** (A-B)  
654 Fosfomycin disk diffusion assay. (A) *L. monocytogenes* strains wt pIMK3,  $\Delta eslB$  pIMK3, wt  
655 pIMK3-*murA* and  $\Delta eslB$  pIMK3-*murA* were plated on BHI plates containing 1 mM IPTG.

656 Fosfomycin-soaked disks were placed on the agar surface and the plates incubated for 24 h  
657 at 37°C. Yellow lines indicate the diameter of the zone of inhibition. (B) The inhibition zones  
658 for the indicated strains were measured and the average values and standard deviation of  
659 three independent experiments were plotted. (C) Drop dilution assay. Dilutions of *L.*  
660 *monocytogenes* strains 10403S pIMK3 (wt pIMK3),  $\Delta eslB$  pIMK3, wt pIMK3-*murA* and  $\Delta eslB$   
661 pIMK3-*murA* were spotted on BHI plates, BHI plates containing 100 µg/ml lysozyme or  
662 containing 0.5 M sucrose and 0.025 µg/ml penicillin G, which were incubated at 37°C or on  
663 BHI plates, which were incubated at 42°C. (D) Microscopy images of *L. monocytogenes*  
664 strains. Bacterial membranes were stained with Nile red as described in the methods section.  
665 Scale bar is 2 µm. (E) Cell length of *L. monocytogenes* strains shown in panel B. The cell  
666 length of 50 cells per strain was determined and the median cell length calculated. The average  
667 values and standard deviations of three independent experiments are plotted. For statistical  
668 analysis, a one-way ANOVA coupled with Tukey's multiple comparison test was used (\*\*  $p \leq$   
669 0.01, \*\*\*  $p \leq 0.001$ , \*\*\*\*  $p \leq 0.0001$ ).

670

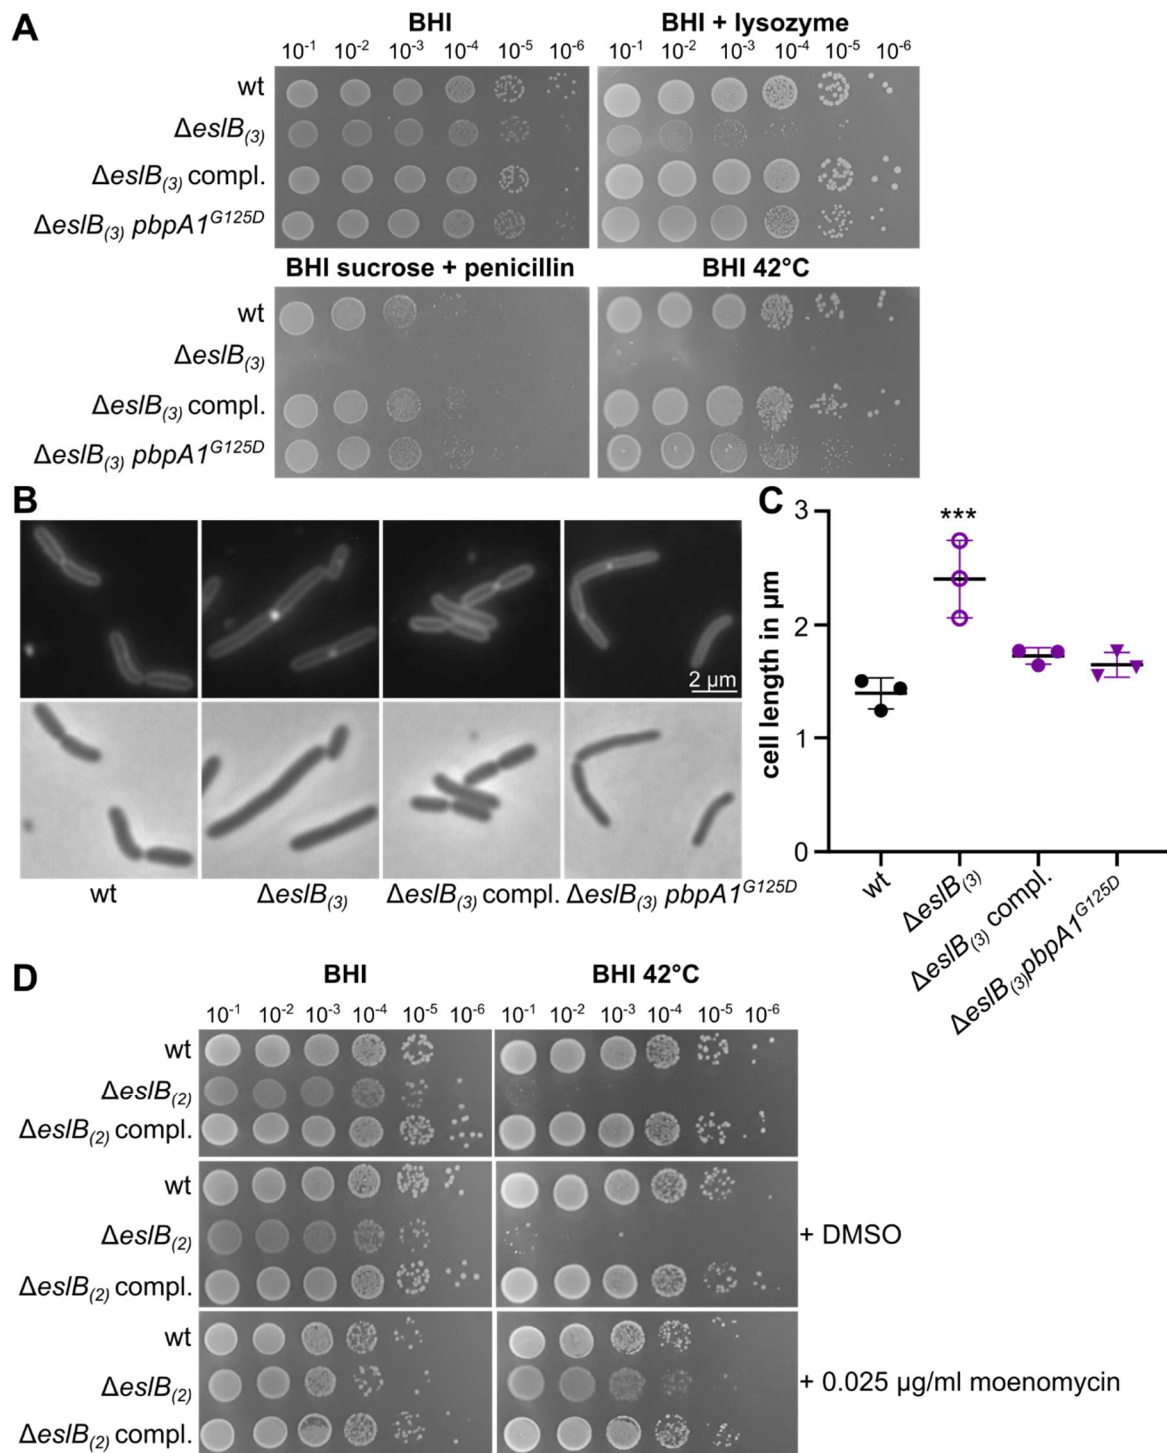

671

672 **Figure 5: Inactivation of the glycosyltransferase of penicillin binding proteins rescues**

673 **the *esIB* mutant.** (A) Drop dilution assay. Dilutions of *L. monocytogenes* strains 10403S (wt),

674  $\Delta esIB_{(3)}$ ,  $\Delta esIB_{(3)}$  compl. and  $\Delta esIB_{(3)}$  *pbpA1*<sup>G125D</sup> were spotted on BHI plates, BHI plates

675 containing 100  $\mu$ g/ml lysozyme or containing 0.5 M sucrose and 0.025  $\mu$ g/ml penicillin G, which

676 were incubated at 37°C or on BHI plates, which were incubated at 42°C. (B) Microscopy

677 images of *L. monocytogenes* strains. Bacterial membranes were stained with Nile red as

678 described in the methods section. Scale bar is 2  $\mu$ m. (C) Cell length of *L. monocytogenes*

679 strains shown in panel B. The cell length of 50 cells per strain was determined and the median

680 cell length calculated. The average values and standard deviations of three independent  
 681 experiments are plotted. (D) Drop dilution assay. Dilutions of *L. monocytogenes* strains  
 682 10403S (wt),  $\Delta eslB_{(2)}$  and  $\Delta eslB_{(2)}$  compl. were spotted on BHI plates, BHI plates containing  
 683 DMSO or containing 0.025  $\mu$ g/ml moenomycin and incubated at 37°C or 42°C.

684

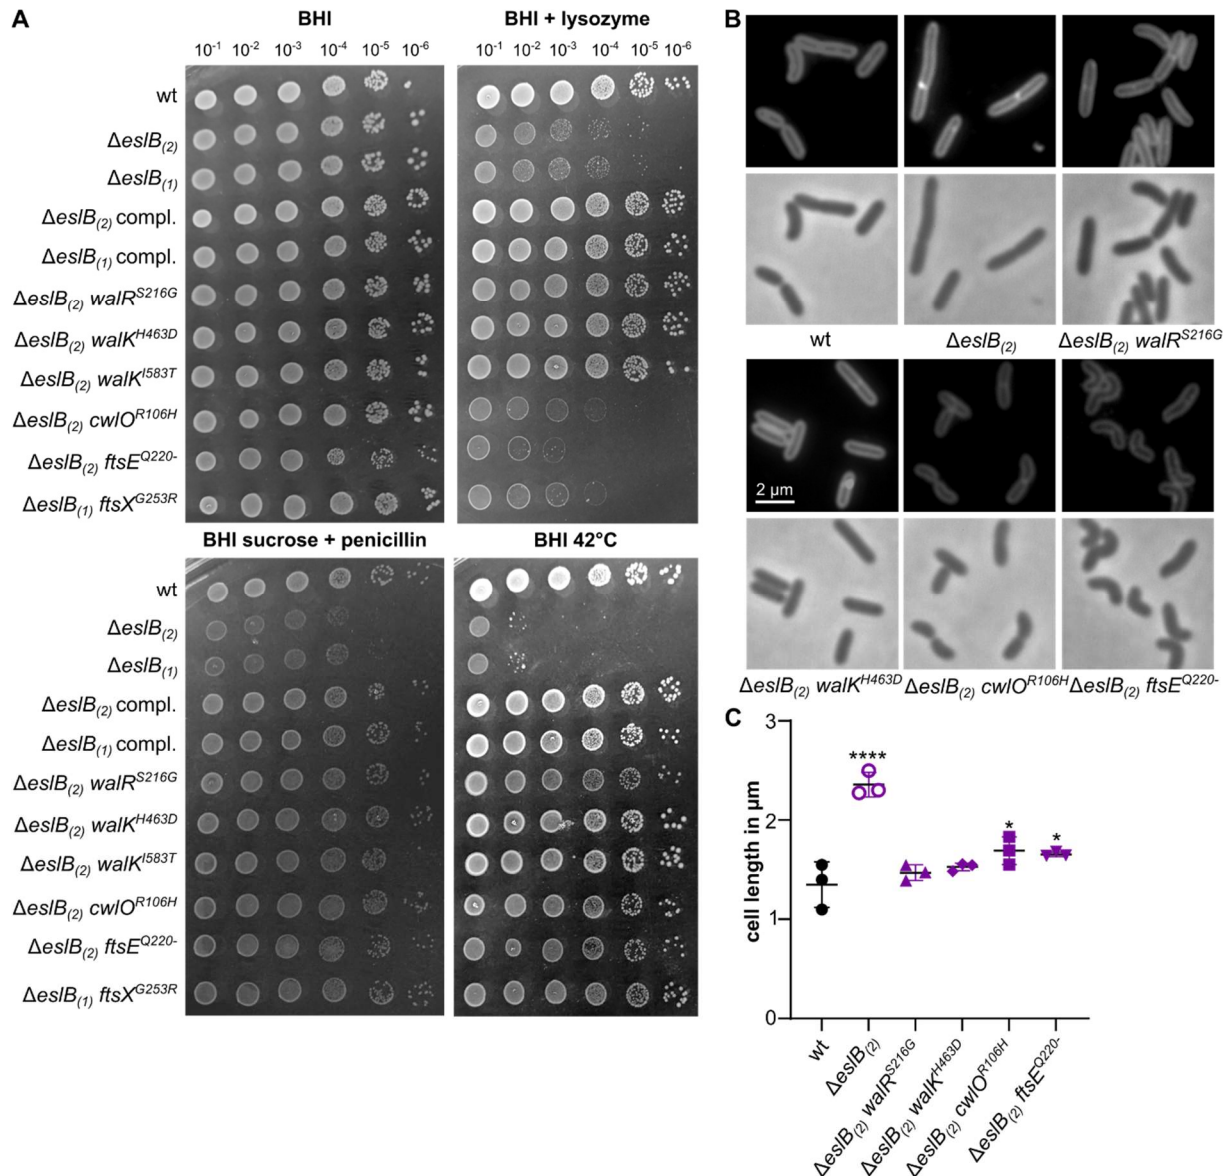

685

686 **Figure 6: Mutations in *walR*, *walk*, *cwIO*, *ftsE* and *ftsX* suppress *eslB* phenotypes.** (A)  
 687 Drop dilution assay. Dilutions of *L. monocytogenes* strains 10403S (wt),  $\Delta eslB_{(2)}$ ,  $\Delta eslB_{(1)}$ ,  
 688  $\Delta eslB_{(2)}$  compl.,  $\Delta eslB_{(1)}$  compl.,  $\Delta eslB_{(2)}$  *walR*<sup>S216G</sup>,  $\Delta eslB_{(2)}$  *walk*<sup>H463D</sup>,  $\Delta eslB_{(2)}$  *walk*<sup>I583T</sup>,  
 689  $\Delta eslB_{(2)}$  *cwIO*<sup>R106H</sup>,  $\Delta eslB_{(2)}$  *ftsE*<sup>Q220-</sup> and  $\Delta eslB_{(1)}$  *ftsX*<sup>G253R</sup> were spotted on BHI plates, BHI  
 690 plates containing 100  $\mu$ g/ml lysozyme or containing 0.5 M sucrose and 0.025  $\mu$ g/ml penicillin  
 691 G and were incubated at 37°C or on BHI plates that were incubated at 42°C. (B) Microscopy  
 692 images of *L. monocytogenes* strains. Bacterial membranes were stained with Nile red as  
 693 described in the methods section. Scale bar is 2  $\mu$ m. (C) Cell length of *L. monocytogenes*



694 strains shown in panel B. The cell length of 50 cells per strain was determined and the median  
695 cell length calculated. The average values and standard deviations of three independent  
696 experiments are plotted. For statistical analysis, a one-way ANOVA coupled with a Dunnett's  
697 multiple comparison test was used (\*  $p \leq 0.05$ , \*\*\*\*  $p \leq 0.0001$ ).

698

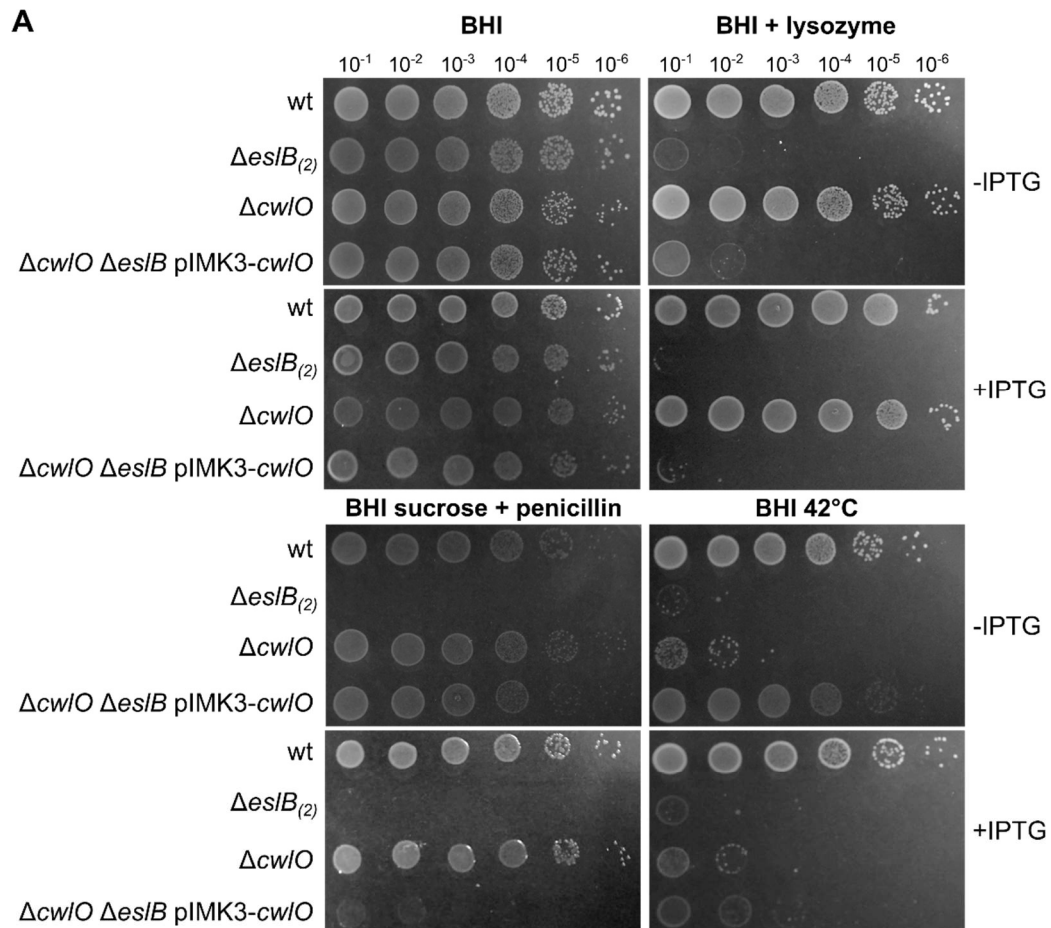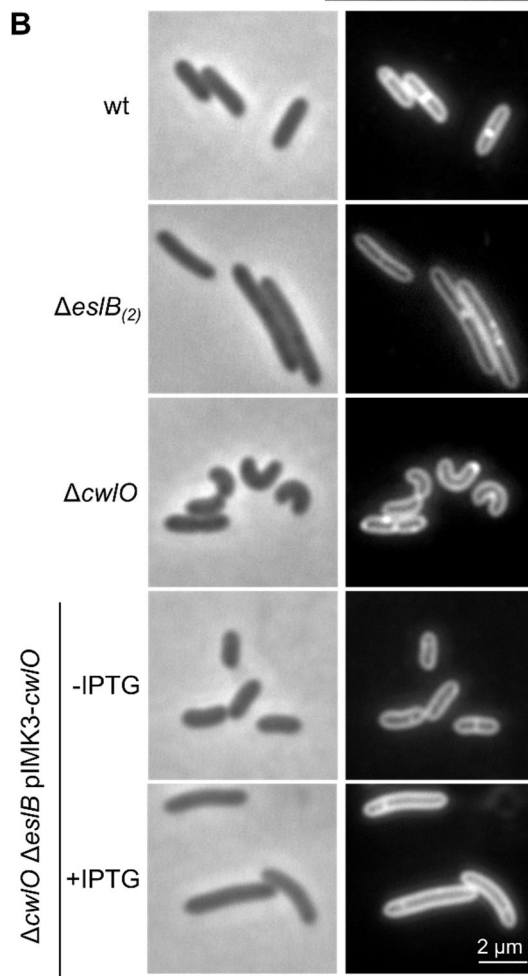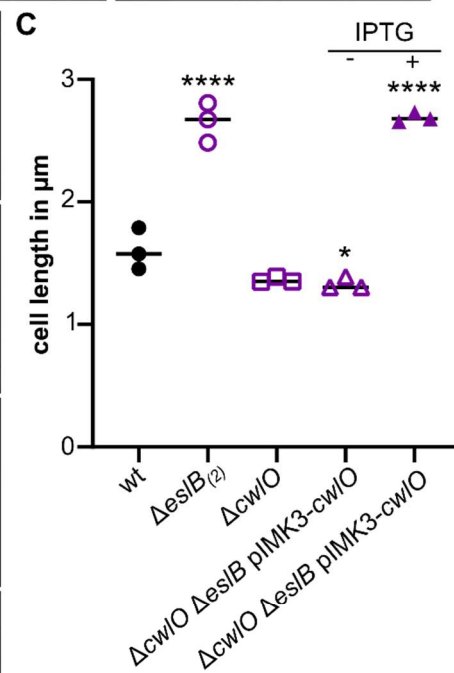

700 **Figure 7: Absence of CwIO suppresses most of the *esIB* phenotypes.** (A) Drop dilution  
 701 assay. Dilutions of *L. monocytogenes* strains 10403S (wt),  $\Delta esIB_{(2)}$ ,  $\Delta cwIO$  and  $\Delta cwIO \Delta esIB$   
 702 pIMK3-*cwIO* were spotted on BHI plates, BHI plates containing 100  $\mu$ g/ml lysozyme or  
 703 containing 0.5 M sucrose and 0.025  $\mu$ g/ml penicillin G and were incubated at 37°C or on BHI  
 704 plates that were incubated at 42°C. For induction of *cwIO* expression, the indicated plates were  
 705 supplemented with 1 mM IPTG. (B) Microscopy images of *L. monocytogenes* strains. Bacterial  
 706 membranes were stained with Nile red as described in the methods section. Scale bar is 2  $\mu$ m.  
 707 (C) Cell length of *L. monocytogenes* strains shown in panel B. The cell length of 50 cells per  
 708 strain was determined and the median cell length calculated. The average values and standard  
 709 deviations of three independent experiments are plotted. For statistical analysis, a one-way  
 710 ANOVA coupled with a Dunnett's multiple comparison test was used (\*  $p \leq 0.05$ , \*\*\*\*  $p \leq$   
 711 0.0001).

712

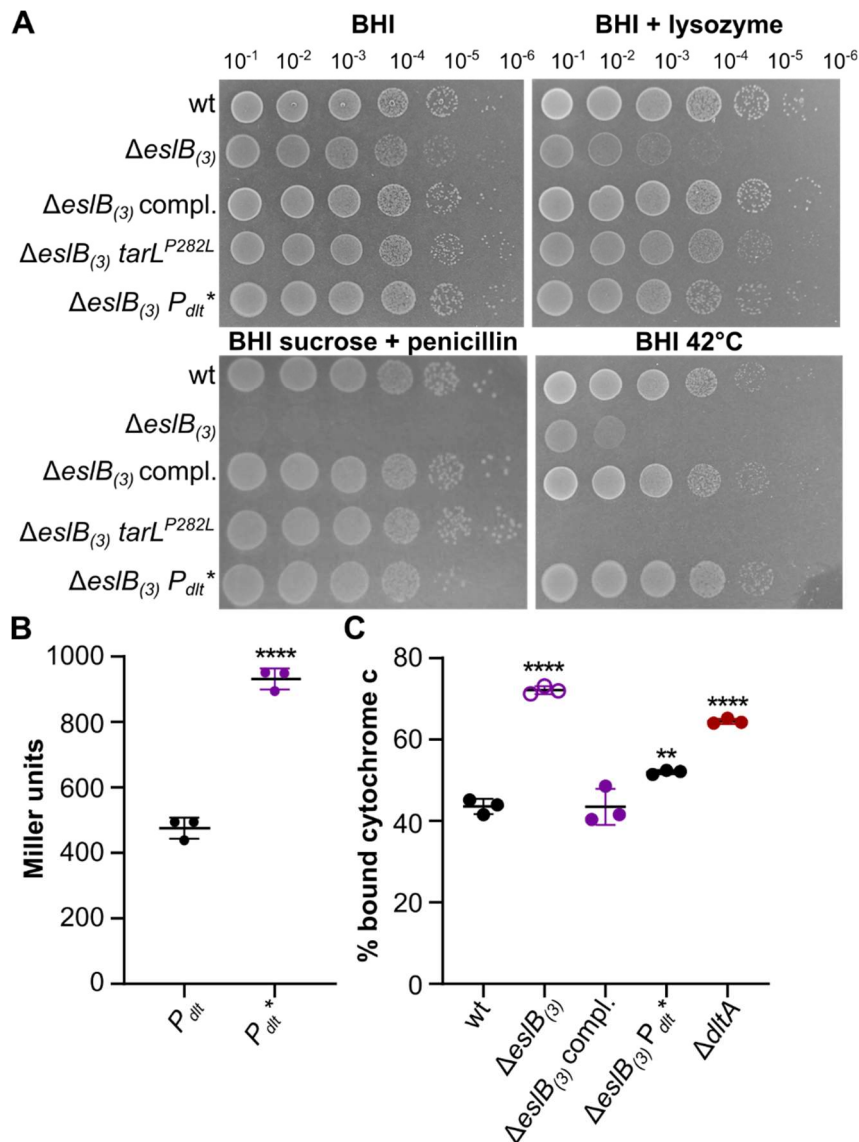

713

714 **Figure 8: Suppression of *esIB* phenotypes by alterations in WTA biosynthesis and**  
715 **modification.** (A) Drop dilution assay. Dilutions of *L. monocytogenes* strains 10403S (wt),  
716  $\Delta esIB_{(3)}$ ,  $\Delta esIB_{(3)}$  compl.,  $\Delta esIB_{(3)}$  *tarL*<sup>P282L</sup> and  $\Delta esIB_{(3)}$  *P*<sub>dlt</sub><sup>\*</sup> were spotted on BHI plates, BHI  
717 plates containing 100 µg/ml lysozyme or containing 0.5 M sucrose and 0.025 µg/ml penicillin  
718 G and were incubated at 37°C or on BHI plates that were incubated at 42°C. (B) β-  
719 galactosidase assay. The *dlt* promoter of *L. monocytogenes* wildtype 10403S (*P*<sub>dlt</sub>) and  
720 suppressor strain  $\Delta esIB_{(3)}$  *P*<sub>dlt</sub><sup>\*</sup> (*P*<sub>dlt</sub><sup>\*</sup>) were fused with *lacZ* and integrated into the *amyE* locus  
721 of *Bacillus subtilis*. The promoter activity was determined in Miller units as described in the  
722 methods section and the average and standard deviation of three independent experiments  
723 were plotted. An unpaired t-test was used for statistical analysis (\*\*\*\* *p* ≤ 0.0001). (C)  
724 Cytochrome C assay. Cells of *L. monocytogenes* strains 10403S,  $\Delta esIB_{(3)}$ ,  $\Delta esIB_{(3)}$  compl. and  
725  $\Delta esIB_{(3)}$  *P*<sub>dlt</sub><sup>\*</sup> were incubated with cytochrome C as described in the methods section. The  
726 percentage of cytochrome C, which is bound by the cell surface, was calculated for three  
727 independent experiments and plotted. A strain lacking DltA was used as control. For statistical  
728 analysis, a one-way ANOVA coupled with a Dunnett's multiple comparison test was used (\*\* *p*  
729 ≤ 0.01, \*\*\*\* *p* ≤ 0.0001).

730

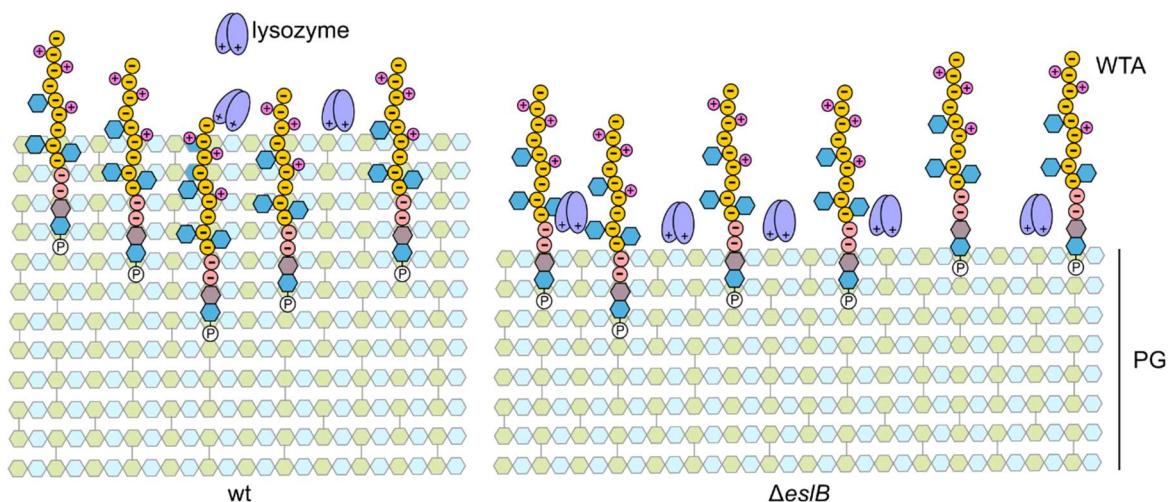

732 **Figure 9: Model of altered WTA presentation on the cell surface of an *esIB* mutant.** The  
733 Gram-positive cell wall is composed of a thick layer of peptidoglycan (PG) and wall teichoic  
734 acids (WTA), which are attached to the MurNAc-moiety of the PG backbone (Brown et al.,  
735 2013). WTA of *L. monocytogenes* 10403S are composed of a negatively charged ribitol  
736 phosphate backbone (indicated by -), which can be modified with GlcNAc residues (blue  
737 hexagons) and positively charged D-alanine residues (indicated by +). The absence of *EsIB*  
738 seems to affect the production and/or distribution of the PG precursor UDP-GlcNAc between  
739 different pathways, which results in the production of a thinner PG layer. WTAs are thought to  
740 partially stick out of the PG layer and we propose that due to the thinner PG layer produced by

741 the *es/B* mutant, a larger portion of the WTA backbone, which is negatively charged, could be  
742 presented on the bacterial cell surface. This would result in a higher negative cell surface  
743 charge of the *es/B* mutant, which would affect the binding capability and/or activity of PG  
744 hydrolases, lysozyme and cationic antimicrobial peptides (Low et al., 2011; Ragland and Criss,  
745 2017; Steudle and Pleiss, 2011; Weidenmaier et al., 2003).

746

747

## 748 TABLES

749 Table 1: Identified sequence alterations in *L. monocytogenes* *eslB* deletion strains and suppressors.

| Strain number                      | Reference position <sup>1</sup> | Type <sup>2</sup> | Ref <sup>3</sup> | Allele <sup>4</sup> | Frequency <sup>5</sup> | Annotations <sup>6</sup>                                                 | AA change <sup>7</sup> | Condition <sup>8</sup> |
|------------------------------------|---------------------------------|-------------------|------------------|---------------------|------------------------|--------------------------------------------------------------------------|------------------------|------------------------|
| ANG4275                            | 2425786-                        | DEL               |                  |                     | 100%                   | <i>lmo2396</i> , internalin                                              | 30 aa deletion         |                        |
| 10403SΔ <i>eslB</i> <sub>(1)</sub> | 2425875                         |                   |                  |                     |                        |                                                                          |                        |                        |
| ANG5386                            | 2583855                         | DEL               | T                | -                   | 100%                   | <i>murZ</i> , UDP- <i>N</i> -acetylglucosamine 1-carboxyvinyltransferase | M240fs                 | P                      |
| ANG5479                            | 310043                          | SNV               | G                | A                   | 100%                   | <i>walK</i> , histidine kinase of TCS WalRK                              | R553H                  | P                      |
| ANG5480                            | 309234                          | SNV               | C                | G                   | 100%                   | <i>walK</i> , histidine kinase of TCS WalRK                              | N283E                  | P                      |
| ANG5488                            | 2537835                         | SNV               | C                | G                   | 100%                   | <i>ftsX</i> , membrane component of ABC transporter FtsEX                | G243R                  | P                      |
| ANG5489                            | 310094                          | SNV               | C                | T                   | 100%                   | <i>walK</i> , histidine kinase of TCS WalRK                              | A570V                  | P                      |
| ANG5499                            | 1491251                         | DEL               | T                | -                   | 100%                   | <i>reoM</i> , regulator of MurA degradation                              | L23fs                  | P                      |
| ANG5662                            | –                               |                   |                  |                     |                        |                                                                          |                        |                        |
| 10403SΔ <i>eslB</i> <sub>(2)</sub> |                                 |                   |                  |                     |                        |                                                                          |                        |                        |
| ANG5698                            | 2582654                         | DEL               | G                | -                   | 100%                   | <i>murZ</i> , UDP- <i>N</i> -acetylglucosamine 1-carboxyvinyltransferase | Q307fs                 | P                      |
| ANG5699                            | 310133                          | SNV               | T                | C                   | 97.4%                  | <i>walK</i> , histidine kinase of TCS WalRK                              | I583T                  | P                      |
| ANG5708                            | 1852252                         | SNV               | G                | A                   | 100%                   | <i>prpC</i> , serine threonine phosphatase                               | P159L                  | P                      |
| ANG5710                            | 2537273                         | SNV               | C                | T                   | 98%                    | <i>cwlO</i> , peptidoglycan DL-endopeptidase                             | R106H                  | P                      |
| ANG5714                            | 2538568                         | SNV               | G                | A                   | 98.4%                  | <i>ftsE</i> , ATP binding protein of ABC transporter FtsEX               | Q220-                  | P                      |
| ANG5733                            | 308133                          | SNV               | A                | G                   | 100%                   | <i>walR</i> , response regulator of TCS WalRK                            | S216G                  | L                      |
| ANG5734                            | 309772                          | SNV               | C                | G                   | 100%                   | <i>walK</i> , histidine kinase of TCS WalRK                              | H463D                  | L                      |
| ANG5737                            | 309085                          | SNV               | G                | T                   | 100%                   | <i>walK</i> , histidine kinase of TCS WalRK                              | V234L                  | L                      |
| ANG5741                            | 309824                          | SNV               | G                | A                   | 100%                   | <i>walK</i> , histidine kinase of TCS WalRK                              | R480H                  | L                      |

|                                     |         |     |   |   |      |                                                                                                  |       |   |  |
|-------------------------------------|---------|-----|---|---|------|--------------------------------------------------------------------------------------------------|-------|---|--|
| ANG5685                             | -       |     |   |   |      |                                                                                                  |       |   |  |
| 10403S $\Delta$ es/B <sub>(3)</sub> |         |     |   |   |      |                                                                                                  |       |   |  |
| ANG5717                             | 1921373 | SNV | G | A | 100% | <i>pbpA1</i> , bifunctional penicillin binding protein                                           | G125D | P |  |
| ANG5729                             | 1090622 | SNV | C | T | 100% | <i>tarL</i> , teichoic acid ribitol-phosphate polymerase                                         | P282L | P |  |
| ANG5746                             | 988580  | SNV | T | C | 100% | Promoter of <i>dlt</i> operon, involved in D-alanylation of wall teichoic and lipoteichoic acids | -     | L |  |

750 <sup>1</sup> Reference position is based on the position in the *L. monocytogenes* 10403S reference genome (NC\_01744).

751 <sup>2</sup> Type of mutation: SNV = single nucleotide variant; DEL = nucleotide deletion.

752 <sup>3</sup> Ref indicates base in reference genome.

753 <sup>4</sup> Allele indicates base at the same position in the sequenced strain.

754 <sup>5</sup> Frequency at which the base change was found in the sequenced strain.

755 <sup>6</sup> AA change indicates the resulting amino acid change in the protein found in the reference strains as compared to the sequenced strain.

756 <sup>7</sup> TCS = Two-component system

757 <sup>8</sup> Condition, which was used to raise suppressors. L = BHI plates containing 100  $\mu$ g/ml lysozyme. P = BHI plates containing 0.5 M sucrose and 0.025 or 0.05  $\mu$ g/ml  
758 penicillin.

759 **REFERENCES**

- 760 Aubry, C., Goulard, C., Nahori, M.-A., Cayet, N., Decalf, J., Sachse, M., Boneca, I.G., Cossart,  
761 P., Dussurget, O., 2011. OatA, a peptidoglycan O-acetyltransferase involved in *Listeria*  
762 *monocytogenes* immune escape, is critical for virulence. *J. Infect. Dis.* 204, 731–740.  
763 <https://doi.org/10.1093/infdis/jir396>
- 764 Bisicchia, P., Noone, D., Lioliou, E., Howell, A., Quigley, S., Jensen, T., Jarmer, H., Devine,  
765 K.M., 2007. The essential YycFG two-component system controls cell wall metabolism in  
766 *Bacillus subtilis*. *Mol. Microbiol.* 65, 180–200. [https://doi.org/10.1111/j.1365-  
767 2958.2007.05782.x](https://doi.org/10.1111/j.1365-2958.2007.05782.x)
- 768 Boneca, I.G., Dussurget, O., Cabanes, D., Nahori, M.-A., Sousa, S., Lecuit, M., Psylinakis, E.,  
769 Bouriotis, V., Hugot, J.-P., Giovannini, M., Coyle, A., Bertin, J., Namane, A., Rousselle,  
770 J.-C., Cayet, N., Prévost, M.-C., Balloy, V., Chignard, M., Philpott, D.J., Cossart, P.,  
771 Girardin, S.E., 2007. A critical role for peptidoglycan N-deacetylation in *Listeria* evasion  
772 from the host innate immune system. *Proc. Natl. Acad. Sci.* 104, 997–1002.  
773 <https://doi.org/10.1073/pnas.0609672104>
- 774 Brown, S., Santa Maria, J.P., Walker, S., 2013. Wall teichoic acids of Gram-positive bacteria.  
775 *Annu. Rev. Microbiol.* 67, 313–336. [https://doi.org/10.1146/annurev-micro-092412-  
776 155620](https://doi.org/10.1146/annurev-micro-092412-155620)
- 777 Brunet, Y.R., Wang, X., Rudner, D.Z., 2019. SweC and SweD are essential co-factors of the  
778 FtsEX-CwlO cell wall hydrolase complex in *Bacillus subtilis*. *PLOS Genet.* 15, e1008296.  
779 <https://doi.org/10.1371/journal.pgen.1008296>
- 780 Burke, T.P., Loukitcheva, A., Zemansky, J., Wheeler, R., Boneca, I.G., Portnoy, D.A., 2014.  
781 *Listeria monocytogenes* is resistant to lysozyme through the regulation, not the  
782 acquisition, of cell wall-modifying enzymes. *J. Bacteriol.* 196, 3756–3767.  
783 <https://doi.org/10.1128/JB.02053-14>
- 784 Camilli, A., Tilney, L.G., Portnoy, D.A., 1993. Dual roles of *plcA* in *Listeria monocytogenes*  
785 pathogenesis. *Mol. Microbiol.* 8, 143–157. [https://doi.org/10.1111/j.1365-  
786 2958.1993.tb01211.x](https://doi.org/10.1111/j.1365-2958.1993.tb01211.x)
- 787 Campbell, J., Singh, A.K., Santa Maria, J.P., Kim, Y., Brown, S., Swoboda, J.G., Mylonakis,  
788 E., Wilkinson, B.J., Walker, S., 2011. Synthetic lethal compound combinations reveal a  
789 fundamental connection between wall teichoic acid and peptidoglycan biosyntheses in  
790 *Staphylococcus aureus*. *ACS Chem. Biol.* 6, 106–116. <https://doi.org/10.1021/cb100269f>
- 791 Carballido-López, R., Formstone, A., Li, Y., Ehrlich, S.D., Noirot, P., Errington, J., 2006. Actin  
792 homolog MreBH governs cell morphogenesis by localization of the cell wall hydrolase  
793 LytE. *Dev. Cell* 11, 399–409. <https://doi.org/10.1016/j.devcel.2006.07.017>
- 794 Carroll, S.A., Hain, T., Technow, U., Darji, A., Pashalidis, P., Joseph, S.W., Chakraborty, T.,  
795 2003. Identification and characterization of a peptidoglycan hydrolase, MurA, of *Listeria*



- 796 *monocytogenes*, a muramidase needed for cell separation. J. Bacteriol. 185, 6801–6808.  
797 <https://doi.org/10.1128/JB.185.23.6801-6808.2003>
- 798 Cho, H., Wivagg, C.N., Kapoor, M., Barry, Z., Rohs, P.D.A., Suh, H., Marto, J.A., Garner, E.C.,  
799 Bernhardt, T.G., 2016. Bacterial cell wall biogenesis is mediated by SEDS and PBP  
800 polymerase families functioning semi-autonomously. Nat. Microbiol. 1, 16172.  
801 <https://doi.org/10.1038/nmicrobiol.2016.172>
- 802 Delauné, A., Dubrac, S., Blanchet, C., Poupel, O., Mäder, U., Hiron, A., Leduc, A., Fitting, C.,  
803 Nicolas, P., Cavailon, J.-M., Adib-Conquy, M., Msadek, T., 2012. The WalkR system  
804 controls major staphylococcal virulence genes and is involved in triggering the host  
805 inflammatory response. Infect. Immun. 80, 3438–3453. <https://doi.org/10.1128/IAI.00195->  
806 12
- 807 Delaune, A., Poupel, O., Mallet, A., Coic, Y.-M., Msadek, T., Dubrac, S., 2011. Peptidoglycan  
808 crosslinking relaxation plays an important role in *Staphylococcus aureus* WalkR-  
809 dependent cell viability. PLoS One 6, e17054.  
810 <https://doi.org/10.1371/journal.pone.0017054>
- 811 Dion, M.F., Kapoor, M., Sun, Y., Wilson, S., Ryan, J., Vigouroux, A., van Teeffelen, S.,  
812 Oldenbourg, R., Garner, E.C., 2019. *Bacillus subtilis* cell diameter is determined by the  
813 opposing actions of two distinct cell wall synthetic systems. Nat. Microbiol. 4, 1294–1305.  
814 <https://doi.org/10.1038/s41564-019-0439-0>
- 815 Dohihal, G.S., Brunet, Y.R., Flores-Kim, J., Rudner, D.Z., 2019. Homeostatic control of cell  
816 wall hydrolysis by the WalRK two-component signaling pathway in *Bacillus subtilis*. Elife  
817 8, e52088. <https://doi.org/10.7554/eLife.52088>
- 818 Domínguez-Cuevas, P., Porcelli, I., Daniel, R.A., Errington, J., 2013. Differentiated roles for  
819 MreB-actin isologues and autolytic enzymes in *Bacillus subtilis* morphogenesis. Mol.  
820 Microbiol. 89, 1084–1098. <https://doi.org/10.1111/mmi.12335>
- 821 Domínguez-Cuevas, P., Porcelli, I., Daniel, R.A., Errington, J., 2013. Differentiated roles for  
822 MreB-actin isologues and autolytic enzymes in *Bacillus subtilis* morphogenesis. Mol.  
823 Microbiol. 89, 1084–1098. <https://doi.org/10.1111/mmi.12335>
- 824 Du, W., Brown, J.R., Sylvester, D.R., Huang, J., Chalker, A.F., So, C.Y., Holmes, D.J., Payne,  
825 D.J., Wallis, N.G., 2000. Two active forms of UDP-N-acetylglucosamine enolpyruvyl  
826 transferase in gram-positive bacteria. J. Bacteriol. 182, 4146–4152.  
827 <https://doi.org/10.1128/JB.182.15.4146-4152.2000>
- 828 Dubrac, S., Bisicchia, P., Devine, K.M., Msadek, T., 2008. A matter of life and death: cell wall  
829 homeostasis and the WalkR (YycGF) essential signal transduction pathway. Mol.  
830 Microbiol. 70, 1307–1322. <https://doi.org/10.1111/j.1365-2958.2008.06483.x>
- 831 Dubrac, S., Msadek, T., 2004. Identification of genes controlled by the essential YycG/YycF  
832 two-component system of *Staphylococcus aureus*. J. Bacteriol. 186, 1175–1181.

- 833 <https://doi.org/10.1128/JB.186.4.1175-1181.2004>
- 834 Durack, J., Burke, T.P., Portnoy, D.A., 2015. A *prl* mutation in SecY suppresses secretion and  
835 virulence defects of *Listeria monocytogenes secA2* mutants. J. Bacteriol. 197, 932–942.  
836 <https://doi.org/10.1128/JB.02284-14>
- 837 Emami, K., Guyet, A., Kawai, Y., Devi, J., Wu, L.J., Allenby, N., Daniel, R.A., Errington, J.,  
838 2017. RodA as the missing glycosyltransferase in *Bacillus subtilis* and antibiotic discovery  
839 for the peptidoglycan polymerase pathway. Nat. Microbiol. 2, 16253.  
840 <https://doi.org/10.1038/nmicrobiol.2016.253>
- 841 Eugster, M.R., Morax, L.S., Hüls, V.J., Huwiler, S.G., Leclercq, A., Lecuit, M., Loessner, M.J.,  
842 2015. Bacteriophage predation promotes serovar diversification in *Listeria*  
843 *monocytogenes*. Mol. Microbiol. 97, 33–46. <https://doi.org/10.1111/mmi.13009>
- 844 Fischer, M., Engelgeh, T., Rothe, P., Fuchs, S., Thürmer, A., Halbedel, S., 2022. *Listeria*  
845 *monocytogenes* gene essentiality under laboratory conditions and during macrophage  
846 infection. bioRxiv 2022.03.04.482958. <https://doi.org/10.1101/2022.03.04.482958>
- 847 Hakulinen, J.K., Hering, J., Brändén, G., Chen, H., Snijder, A., Ek, M., Johansson, P., 2017.  
848 MraY-antibiotic complex reveals details of tunicamycin mode of action. Nat. Chem. Biol.  
849 13, 265–267. <https://doi.org/10.1038/nchembio.2270>
- 850 Hashimoto, M., Ooiwa, S., Sekiguchi, J., 2012. Synthetic lethality of the *lytE cw/O* genotype in  
851 *Bacillus subtilis* is caused by lack of D,L-endopeptidase activity at the lateral cell wall. J.  
852 Bacteriol. 194, 796–803. <https://doi.org/10.1128/JB.05569-11>
- 853 Herbert, S., Bera, A., Nerz, C., Kraus, D., Peschel, A., Goerke, C., Meehl, M., Cheung, A.,  
854 Götz, F., 2007. Molecular basis of resistance to muramidase and cationic antimicrobial  
855 peptide activity of lysozyme in staphylococci. PLoS Pathog. 3, e102.  
856 <https://doi.org/10.1371/journal.ppat.0030102>
- 857 Howell, A., Dubrac, S., Andersen, K.K., Noone, D., Fert, J., Msadek, T., Devine, K., 2003.  
858 Genes controlled by the essential YycG/YycF two-component system of *Bacillus subtilis*  
859 revealed through a novel hybrid regulator approach. Mol. Microbiol. 49, 1639–1655.  
860 <https://doi.org/10.1046/j.1365-2958.2003.03661.x>
- 861 Huber, G., Neseemann, G., 1968. Moenomycin, an inhibitor of cell wall synthesis. Biochem.  
862 Biophys. Res. Commun. 30, 7–13. [https://doi.org/10.1016/0006-291x\(68\)90704-3](https://doi.org/10.1016/0006-291x(68)90704-3)
- 863 Kahan, F.M., Kahan, J.S., Cassidy, P.J., Kropp, H., 1974. The mechanism of action of  
864 fosfomycin (phosphonomycin). Ann. N. Y. Acad. Sci. 235, 364–386.  
865 <https://doi.org/10.1111/j.1749-6632.1974.tb43277.x>
- 866 Kang, J., Wiedmann, M., Boor, K.J., Bergholz, T.M., 2015. VirR-Mediated resistance of *Listeria*  
867 *monocytogenes* against food antimicrobials and cross-protection induced by exposure to  
868 organic acid salts. Appl. Environ. Microbiol. 81, 4553–4562.  
869 <https://doi.org/10.1128/AEM.00648-15>

- 870 Kock, H., Gerth, U., Hecker, M., 2004. MurAA, catalysing the first committed step in  
871 peptidoglycan biosynthesis, is a target of Clp-dependent proteolysis in *Bacillus subtilis*.  
872 Mol. Microbiol. 51, 1087–1102. <https://doi.org/10.1046/j.1365-2958.2003.03875.x>
- 873 Korsak, D., Markiewicz, Z., Gutkind, G.O., Ayala, J.A., 2010. Identification of the full set of  
874 *Listeria monocytogenes* penicillin-binding proteins and characterization of PBPD2  
875 (Lmo2812). BMC Microbiol. 10, 239. <https://doi.org/10.1186/1471-2180-10-239>
- 876 Lai, G.C., Cho, H., Bernhardt, T.G., 2017. The mecillinam resistome reveals a role for  
877 peptidoglycan endopeptidases in stimulating cell wall synthesis in *Escherichia coli*. PLoS  
878 Genet. 13, e1006934. <https://doi.org/10.1371/journal.pgen.1006934>
- 879 Lauer, P., Chow, M.Y.N., Loessner, M.J., Portnoy, D.A., Calendar, R., 2002. Construction,  
880 characterization, and use of two *Listeria monocytogenes* site-specific phage integration  
881 vectors. J. Bacteriol. 184, 4177–4186. <https://doi.org/10.1128/JB.184.15.4177-4186.2002>
- 882 Leclercq, S., Derouaux, A., Olatunji, S., Fraipont, C., Egan, A.J.F., Vollmer, W., Breukink, E.,  
883 Terrak, M., 2017. Interplay between penicillin-binding proteins and SEDS proteins  
884 promotes bacterial cell wall synthesis. Sci. Rep. 7, 43306.  
885 <https://doi.org/10.1038/srep43306>
- 886 Low, L.Y., Yang, C., Perego, M., Osterman, A., Liddington, R., 2011. Role of net charge on  
887 catalytic domain and influence of cell wall binding domain on bactericidal activity,  
888 specificity, and host range of phage lysins. J. Biol. Chem. 286, 34391–34403.  
889 <https://doi.org/10.1074/jbc.M111.244160>
- 890 Marquardt, J.L., Brown, E.D., Lane, W.S., Haley, T.M., Ichikawa, Y., Wong, C.H., Walsh, C.T.,  
891 1994. Kinetics, stoichiometry, and identification of the reactive thiolate in the inactivation  
892 of UDP-GlcNAc enolpyruvyl transferase by the antibiotic fosfomycin. Biochemistry 33,  
893 10646–10651. <https://doi.org/10.1021/bi00201a011>
- 894 Meeske, A.J., Riley, E.P., Robins, W.P., Uehara, T., Mekalanos, J.J., Kahne, D., Walker, S.,  
895 Kruse, A.C., Bernhardt, T.G., Rudner, D.Z., 2016. SEDS proteins are a widespread family  
896 of bacterial cell wall polymerases. Nature 537, 634–638.  
897 <https://doi.org/10.1038/nature19331>
- 898 Meeske, A.J., Sham, L.-T., Kimsey, H., Koo, B.-M., Gross, C.A., Bernhardt, T.G., Rudner, D.Z.,  
899 2015. MurJ and a novel lipid II flippase are required for cell wall biogenesis in *Bacillus*  
900 *subtilis*. Proc. Natl. Acad. Sci. 112, 6437–6442. <https://doi.org/10.1073/pnas.1504967112>
- 901 Meisner, J., Montero Llopis, P., Sham, L.-T., Garner, E., Bernhardt, T.G., Rudner, D.Z., 2013.  
902 FtsEX is required for CwIO peptidoglycan hydrolase activity during cell wall elongation in  
903 *Bacillus subtilis*. Mol. Microbiol. 89, 1069–1083. <https://doi.org/10.1111/mmi.12330>
- 904 Miller, J.H., 1972. Experiments in Molecular Genetics. Cold Spring Harbor Laboratory, NY.
- 905 Neuhaus, F.C., Baddiley, J., 2003. A continuum of anionic charge: structures and functions of  
906 D-alanyl-teichoic acids in Gram-positive bacteria. Microbiol. Mol. Biol. Rev. 67, 686–723.

- 907 <https://doi.org/10.1128/MMBR.67.4.686-723.2003>
- 908 Ohnishi, R., Ishikawa, S., Sekiguchi, J., 1999. Peptidoglycan hydrolase LytF plays a role in cell  
909 separation with CwF during vegetative growth of *Bacillus subtilis*. *J. Bacteriol.* 181, 3178–  
910 3184. <https://doi.org/10.1128/JB.181.10.3178-3184.1999>
- 911 Ostash, B., Walker, S., 2010. Moenomycin family antibiotics: chemical synthesis, biosynthesis,  
912 and biological activity. *Nat. Prod. Rep.* 27, 1594–1617. <https://doi.org/10.1039/c001461n>
- 913 Pazos, M., Peters, K., 2019. Peptidoglycan. *Subcell. Biochem.* 92, 127–168.  
914 [https://doi.org/10.1007/978-3-030-18768-2\\_5](https://doi.org/10.1007/978-3-030-18768-2_5)
- 915 Pensinger, D.A., Gutierrez, K. V, Smith, H.B., Vincent, W.J.B., Stevenson, D.S., Black, K.A.,  
916 Perez-Medina, K.M., Dillard, J.P., Rhee, K.Y., Amador-Noguez, D., Huynh, T.N., Sauer,  
917 J.-D., 2021. *Listeria monocytogenes* GlmR is an accessory uridyltransferase essential for  
918 cytosolic survival and virulence. *bioRxiv* 2021.10.27.466214.  
919 <https://doi.org/10.1101/2021.10.27.466214>
- 920 Percy, M.G., Gründling, A., 2014. Lipoteichoic acid synthesis and function in Gram-positive  
921 bacteria. *Annu. Rev. Microbiol.* 68, 81–100. <https://doi.org/10.1146/annurev-micro-091213-112949>
- 923 Perego, M., Glaser, P., Minutello, A., Strauch, M.A., Leopold, K., Fischer, W., 1995.  
924 Incorporation of D-alanine into lipoteichoic acid and wall teichoic acid in *Bacillus subtilis*.  
925 Identification of genes and regulation. *J. Biol. Chem.* 270, 15598–15606.  
926 <https://doi.org/10.1074/jbc.270.26.15598>
- 927 Peschel, A., Otto, M., Jack, R.W., Kalbacher, H., Jung, G., Götz, F., 1999. Inactivation of the  
928 *dlt* operon in *Staphylococcus aureus* confers sensitivity to defensins, protegrins, and other  
929 antimicrobial peptides. *J. Biol. Chem.* 274, 8405–8410.  
930 <https://doi.org/10.1074/jbc.274.13.8405>
- 931 Pilgrim, S., Kolb-Mäurer, A., Gentschev, I., Goebel, W., Kuhn, M., 2003. Deletion of the gene  
932 encoding *p60* in *Listeria monocytogenes* leads to abnormal cell division and loss of actin-  
933 based motility. *Infect. Immun.* 71, 3473–3484. <https://doi.org/10.1128/IAI.71.6.3473-3484.2003>
- 935 Price, N.P.J., Tsvetanova, B., 2007. Biosynthesis of the tunicamycins: a review. *J. Antibiot.*  
936 (Tokyo). 60, 485–491. <https://doi.org/10.1038/ja.2007.62>
- 937 Ragland, S.A., Criss, A.K., 2017. From bacterial killing to immune modulation: Recent insights  
938 into the functions of lysozyme. *PLoS Pathog.* 13, e1006512.  
939 <https://doi.org/10.1371/journal.ppat.1006512>
- 940 Rismondo, J., Bender, J.K., Halbedel, S., 2016. Suppressor mutations linking *gpsB* with the  
941 first committed step of peptidoglycan biosynthesis in *Listeria monocytogenes*. *J. Bacteriol.*  
942 199, e00393-16. <https://doi.org/10.1128/JB.00393-16>
- 943 Rismondo, J., Gillis, A., Gründling, A., 2021a. Modifications of cell wall polymers in Gram-

- 944 positive bacteria by multi-component transmembrane glycosylation systems. *Curr. Opin.*  
945 *Microbiol.* 60, 24–33. <https://doi.org/10.1016/j.mib.2021.01.007>
- 946 Rismondo, J., Möller, L., Aldridge, C., Gray, J., Vollmer, W., Halbedel, S., 2015. Discrete and  
947 overlapping functions of peptidoglycan synthases in growth, cell division and virulence of  
948 *Listeria monocytogenes*. *Mol. Microbiol.* 95, 332–351. <https://doi.org/10.1111/mmi.12873>
- 949 Rismondo, J., Percy, M.G., Gründling, A., 2018. Discovery of genes required for lipoteichoic  
950 acid glycosylation predicts two distinct mechanisms for wall teichoic acid glycosylation. *J.*  
951 *Biol. Chem.* 293, 3293–3306. <https://doi.org/10.1074/jbc.RA117.001614>
- 952 Rismondo, J., Schulz, L.M., 2021. Not just transporters: Alternative functions of ABC  
953 transporters in *Bacillus subtilis* and *Listeria monocytogenes*. *Microorganisms* 9, 163.  
954 <https://doi.org/10.3390/microorganisms9010163>
- 955 Rismondo, J., Schulz, L.M., Yacoub, M., Wadhawan, A., Hoppert, M., Dionne, M.S., Gründling,  
956 A., 2021b. EslB is required for cell wall biosynthesis and modification in *Listeria*  
957 *monocytogenes*. *J. Bacteriol.* 203, e00553-20. <https://doi.org/10.1128/JB.00553-20>
- 958 Ruiz, N., 2008. Bioinformatics identification of MurJ (MviN) as the peptidoglycan lipid II flippase  
959 in *Escherichia coli*. *Proc. Natl. Acad. Sci. U. S. A.* 105, 15553–15557.  
960 <https://doi.org/10.1073/pnas.0808352105>
- 961 Salamaga, B., Kong, L., Pasquina-Lemonche, L., Lafage, L., von und zur Muhlen, M., Gibson,  
962 J.F., Grybchuk, D., Tooke, A.K., Panchal, V., Culp, E.J., Tatham, E., O’Kane, M.E.,  
963 Catley, T.E., Renshaw, S.A., Wright, G.D., Plevka, P., Bullough, P.A., Han, A., Hobbs,  
964 J.K., Foster, S.J., 2021. Demonstration of the role of cell wall homeostasis in  
965 *Staphylococcus aureus* growth and the action of bactericidal antibiotics. *Proc. Natl. Acad.*  
966 *Sci.* 118, e2106022118. <https://doi.org/10.1073/pnas.2106022118>
- 967 Sarkar, P., Yarlagadda, V., Ghosh, C., Halder, J., 2017. A review on cell wall synthesis  
968 inhibitors with an emphasis on glycopeptide antibiotics. *Medchemcomm* 8, 516–533.  
969 <https://doi.org/10.1039/c6md00585c>
- 970 Sassine, J., Sousa, J., Lalk, M., Daniel, R.A., Vollmer, W., 2020. Cell morphology maintenance  
971 in *Bacillus subtilis* through balanced peptidoglycan synthesis and hydrolysis. *Sci. Rep.*  
972 10, 17910. <https://doi.org/10.1038/s41598-020-74609-5>
- 973 Sham, L.-T., Butler, E.K., Lebar, M.D., Kahne, D., Bernhardt, T.G., Ruiz, N., 2014. Bacterial  
974 cell wall. MurJ is the flippase of lipid-linked precursors for peptidoglycan biogenesis.  
975 *Science* 345, 220–222. <https://doi.org/10.1126/science.1254522>
- 976 Shen, Y., Boulos, S., Sumrall, E., Gerber, B., Julian-Rodero, A., Eugster, M.R., Fieseler, L.,  
977 Nyström, L., Ebert, M.-O., Loessner, M.J., 2017. Structural and functional diversity in  
978 *Listeria* cell wall teichoic acids. *J. Biol. Chem.* 292, 17832–17844.  
979 <https://doi.org/10.1074/jbc.M117.813964>
- 980 Soldo, B., Lazarevic, V., Karamata, D., 2002. *tagO* is involved in the synthesis of all anionic

- 981 cell-wall polymers in *Bacillus subtilis* 168. *Microbiology* 148, 2079–2087.  
982 <https://doi.org/10.1099/00221287-148-7-2079>
- 983 Steudle, A., Pleiss, J., 2011. Modelling of lysozyme binding to a cation exchange surface at  
984 atomic detail: the role of flexibility. *Biophys. J.* 100, 3016–3024.  
985 <https://doi.org/10.1016/j.bpj.2011.05.024>
- 986 Sun, L., Rogiers, G., Michiels, C.W., 2021. The natural antimicrobial *trans*-Cinnamaldehyde  
987 interferes with UDP-N-acetylglucosamine biosynthesis and cell wall homeostasis in  
988 *Listeria monocytogenes*. *Foods* 10, 1666. <https://doi.org/10.3390/foods10071666>
- 989 Taguchi, A., Welsh, M.A., Marmont, L.S., Lee, W., Sjodt, M., Kruse, A.C., Kahne, D.,  
990 Bernhardt, T.G., Walker, S., 2019. FtsW is a peptidoglycan polymerase that is functional  
991 only in complex with its cognate penicillin-binding protein. *Nat. Microbiol.* 4, 587–594.  
992 <https://doi.org/10.1038/s41564-018-0345-x>
- 993 Takada, H., Shiwa, Y., Takino, Y., Osaka, N., Ueda, S., Watanabe, S., Chibazakura, T.,  
994 Su’etsugu, M., Utsumi, R., Yoshikawa, H., 2018. Essentiality of WalRK for growth in  
995 *Bacillus subtilis* and its role during heat stress. *Microbiology* 164, 670–684.  
996 <https://doi.org/10.1099/mic.0.000625>
- 997 Tesson, B., Dajkovic, A., Keary, R., Marlière, C., Dupont-Gillain, C.C., Carballido-López, R.,  
998 2022. Magnesium rescues the morphology of *Bacillus subtilis mreB* mutants through its  
999 inhibitory effect on peptidoglycan hydrolases. *Sci. Rep.* 12, 1137.  
1000 <https://doi.org/10.1038/s41598-021-04294-5>
- 1001 Vadyvaloo, V., Arous, S., Gravesen, A., Héchard, Y., Chauhan-Haubrock, R., Hastings, J.W.,  
1002 Rautenbach, M., 2004. Cell-surface alterations in class IIa bacteriocin-resistant *Listeria*  
1003 *monocytogenes* strains. *Microbiology* 150, 3025–3033.  
1004 <https://doi.org/10.1099/mic.0.27059-0>
- 1005 Van Heijenoort, Y., Derrien, M., Van Heijenoort, J., 1978. Polymerization by transglycosylation  
1006 in the biosynthesis of the peptidoglycan of *Escherichia coli* K 12 and its inhibition by  
1007 antibiotics. *FEBS Lett.* 89, 141–144. [https://doi.org/10.1016/0014-5793\(78\)80540-7](https://doi.org/10.1016/0014-5793(78)80540-7)
- 1008 Vigouroux, A., Cordier, B., Aristov, A., Alvarez, L., Özbaykal, G., Chaze, T., Oldewurtel, E.R.,  
1009 Matondo, M., Cava, F., Bikard, D., van Teeffelen, S., 2020. Class-A penicillin binding  
1010 proteins do not contribute to cell shape but repair cell-wall defects. *Elife* 9, e51998.  
1011 <https://doi.org/10.7554/eLife.51998>
- 1012 Vollmer, W., Joris, B., Charlier, P., Foster, S., 2008. Bacterial peptidoglycan (murein)  
1013 hydrolases. *FEMS Microbiol. Rev.* 32, 259–286. <https://doi.org/10.1111/j.1574-6976.2007.00099.x>
- 1014
- 1015 Wamp, S., Rothe, P., Stern, D., Holland, G., Döhling, J., Halbedel, S., 2022. MurA escape  
1016 mutations uncouple peptidoglycan biosynthesis from PrkA signaling. *PLoS Pathog.* 18,  
1017 e1010406. <https://doi.org/10.1371/journal.ppat.1010406>

- 1018 Wamp, S., Rutter, Z.J., Rismondo, J., Jennings, C.E., Möller, L., Lewis, R.J., Halbedel, S.,  
1019 2020. PrkA controls peptidoglycan biosynthesis through the essential phosphorylation of  
1020 ReoM. *Elife* 9, e56048. <https://doi.org/10.7554/eLife.56048>
- 1021 Watkinson, R.J., Hussey, H., Baddiley, J., 1971. Shared lipid phosphate carrier in the  
1022 biosynthesis of teichoic acid and peptidoglycan. *Nat. New Biol.* 229, 57–59.  
1023 <https://doi.org/10.1038/newbio229057a0>
- 1024 Wecke, J., Madela, K., Fischer, W., 1997. The absence of D-alanine from lipoteichoic acid and  
1025 wall teichoic acid alters surface charge, enhances autolysis and increases susceptibility  
1026 to methicillin in *Bacillus subtilis*. *Microbiology* 143, 2953–2960.  
1027 <https://doi.org/10.1099/00221287-143-9-2953>
- 1028 Weidenmaier, C., Kristian, S.A., Peschel, A., 2003. Bacterial resistance to antimicrobial host  
1029 defenses--an emerging target for novel antiinfective strategies? *Curr. Drug Targets* 4,  
1030 643–649. <https://doi.org/10.2174/1389450033490731>
- 1031 Yamaguchi, H., Furuhashi, K., Fukushima, T., Yamamoto, H., Sekiguchi, J., 2004.  
1032 Characterization of a new *Bacillus subtilis* peptidoglycan hydrolase Gene, *yvcE* (named  
1033 *cw/O*), and the enzymatic properties of its encoded protein. *J. Biosci. Bioeng.* 98, 174–  
1034 181. <https://doi.org/10.1263/jbb.98.174>
- 1035
